# Supplementary material
Source: PubMed Central journal article supplement (PMC10423792)
Supplement: bmjopen-2021-052432.draft_revisions.pdf [file bmjopen-2021-052432.draft_revisions.pdf]

# BMJ Open

BMJ Open is committed to open peer review. As part of this commitment we make the peer review history of every article we publish publicly available.

When an article is published we post the peer reviewers' comments and the authors' responses online. We also post the versions of the paper that were used during peer review. These are the versions that the peer review comments apply to.

The versions of the paper that follow are the versions that were submitted during the peer review process. They are not the versions of record or the final published versions. They should not be cited or distributed as the published version of this manuscript.

BMJ Open is an open access journal and the full, final, typeset and author-corrected version of record of the manuscript is available on our site with no access controls, subscription charges or pay-per-view fees (<http://bmjopen.bmj.com>).

If you have any questions on BMJ Open's open peer review process please email [info.bmjopen@bmj.com](mailto:info.bmjopen@bmj.com)

# BMJ Open

## COVID-19 vaccine hesitancy in Addis Ababa, Ethiopia: A mixed-methods study

|                               |                                                                                                                                                                                                                                                                                                                                                                                                                                                                                                                                                                                                                                               |
|-------------------------------|-----------------------------------------------------------------------------------------------------------------------------------------------------------------------------------------------------------------------------------------------------------------------------------------------------------------------------------------------------------------------------------------------------------------------------------------------------------------------------------------------------------------------------------------------------------------------------------------------------------------------------------------------|
| Journal:                      | <i>BMJ Open</i>                                                                                                                                                                                                                                                                                                                                                                                                                                                                                                                                                                                                                               |
| Manuscript ID                 | bmjopen-2021-052432                                                                                                                                                                                                                                                                                                                                                                                                                                                                                                                                                                                                                           |
| Article Type:                 | Original research                                                                                                                                                                                                                                                                                                                                                                                                                                                                                                                                                                                                                             |
| Date Submitted by the Author: | 19-Apr-2021                                                                                                                                                                                                                                                                                                                                                                                                                                                                                                                                                                                                                                   |
| Complete List of Authors:     | Dereje, Nebiyu; MyungSung Medical College, Department of Public Health<br>Tsfaye, Abigel; MyungSung Medical College, Department of Medicine<br>Tamene, Beamlak; MyungSung Medical College, Department of Medicine<br>Alemeshet, Dina; MyungSung Medical College, Department of Medicine<br>Abe, Haymanot; MyungSung Medical College, Department of Medicine<br>Tesfa, Nathnael; MyungSung Medical College, Department of Medicine<br>Gedion, Saron; MyungSung Medical College, Department of Medicine<br>Biruk, Tigist; MyungSung Medical College, Department of Medicine<br>Lakew, Yabets; MyungSung Medical College, Department of Medicine |
| Keywords:                     | COVID-19, Public health < INFECTIOUS DISEASES, EPIDEMIOLOGY                                                                                                                                                                                                                                                                                                                                                                                                                                                                                                                                                                                   |
|                               |                                                                                                                                                                                                                                                                                                                                                                                                                                                                                                                                                                                                                                               |

SCHOLARONE™  
Manuscripts

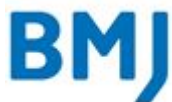

I, the Submitting Author has the right to grant and does grant on behalf of all authors of the Work (as defined in the below author licence), an exclusive licence and/or a non-exclusive licence for contributions from authors who are: i) UK Crown employees; ii) where BMJ has agreed a CC-BY licence shall apply, and/or iii) in accordance with the terms applicable for US Federal Government officers or employees acting as part of their official duties; on a worldwide, perpetual, irrevocable, royalty-free basis to BMJ Publishing Group Ltd ("BMJ") its licensees and where the relevant Journal is co-owned by BMJ to the co-owners of the Journal, to publish the Work in this journal and any other BMJ products and to exploit all rights, as set out in our [licence](#).

The Submitting Author accepts and understands that any supply made under these terms is made by BMJ to the Submitting Author unless you are acting as an employee on behalf of your employer or a postgraduate student of an affiliated institution which is paying any applicable article publishing charge ("APC") for Open Access articles. Where the Submitting Author wishes to make the Work available on an Open Access basis (and intends to pay the relevant APC), the terms of reuse of such Open Access shall be governed by a Creative Commons licence – details of these licences and which [Creative Commons](#) licence will apply to this Work are set out in our licence referred to above.

Other than as permitted in any relevant BMJ Author's Self Archiving Policies, I confirm this Work has not been accepted for publication elsewhere, is not being considered for publication elsewhere and does not duplicate material already published. I confirm all authors consent to publication of this Work and authorise the granting of this licence.

1  
2  
3 **1 COVID-19 vaccine hesitancy in Addis Ababa, Ethiopia: A mixed-methods study**  
4

5  
6 2 Nebiyu Dereje<sup>1\*</sup>, Abigel Tesfaye<sup>2</sup>, Beamlak Tamene<sup>2</sup>, Dina Alemeshet<sup>2</sup>, Haymanot Abe<sup>2</sup>,  
7  
8 3 Nathnael Tesfa<sup>2</sup>, Saron Gedion<sup>2</sup>, Tigist Biruk<sup>2</sup>, Yabets Lakew<sup>2</sup>  
9

10  
11 4 <sup>1</sup>Department of Public Health, Myungsung Medical College, Addis Ababa, Ethiopia  
12

13  
14 5 <sup>2</sup>Department of Medicine, Myungsung Medical College, Addis Ababa, Ethiopia  
15

16  
17 6 \*Corresponding author contact information  
18

19  
20 7 Nebiyu Dereje  
21

22  
23 8 Email: [neba.jahovy@gmail.com](mailto:neba.jahovy@gmail.com)  
24

25  
26 9 P.O.Box 14972  
27

28  
29 10 Addis Ababa, Ethiopia  
30

31  
32 11  
33  
34  
35  
36  
37  
38  
39  
40  
41  
42  
43  
44  
45  
46  
47  
48  
49  
50  
51  
52  
53  
54  
55  
56  
57  
58  
59  
60

## 12 Abstract

13 **Objective:** Data on COVID-19 vaccine hesitancy is limited in Ethiopia and other parts of  
14 Africa. Therefore, the aim of this study was to determine the level of COVID-19 vaccine  
15 hesitancy and its associated factors in Addis Ababa, Ethiopia.

16 **Design:** A community-based concurrent mixed-methods study

17 **Setting:** In a community setting

18 **Participants:** Adult residents (n = 422) of Akaki Kaliti sub-city who were recruited by a multi-  
19 stage sampling technique were included for the quantitative part of the study and 24 adults who  
20 were included purposively for the qualitative in-depth interview.

21 **Outcome Measures:** Data was collected by face-to-face interview by using a semi-structured  
22 questionnaire. Factors associated with COVID-19 vaccine hesitancy were identified by  
23 multivariable binary logistic regression model, as expressed by adjusted odds ratio (aOR).

24 **Results:** One out five (19.1%) participants was not willing to get vaccinated. In the  
25 multivariable analysis, vaccine hesitancy was significantly associated with being female  
26 (aOR=1.97; 95% CI: 1.10 - 3.89), negative attitude towards COVID-19 and its preventive  
27 measures (aOR=1.75; 95% CI: 1.08 - 3.02), and primary information source being social media  
28 (internet) (aOR=3.59; 95% CI: 1.75 - 7.37). Study participants have stated that they did not  
29 have enough information about the vaccine, feared it would not be effective or have too many  
30 side effects, and reflected their uncertainty towards the quality of the vaccine.

1  
2  
3 31 **Conclusions:** A considerable proportion of the people in Addis Ababa have concerns on  
4  
5 32 COVID-19 vaccine and unwilling to accept. This was mainly due to the misconceptions  
6  
7 33 distributed from the use of social media as source of information. Providing the community  
8  
9 34 with health education and consistent efforts to enhance the prevention measures are important,  
10  
11 35 particularly using different medias including social-medias.  
12  
13  
14  
15

16 36 **Key Words:** COVID-19, knowledge, attitude, Vaccine, Hesitancy  
17  
18

### 19 37 **Article Summary**

#### 20 21 22 38 **Strengths and limitations of this study**

- 23  
24  
25 39 • This is the first study from Ethiopia to determine the level of COVID-19 vaccine  
26  
27 40 hesitancy in the general population.
- 28  
29 41 • A mixed-methods approach allows for triangulation of findings from different  
30  
31 42 perspectives.
- 32  
33 43 • The study might be limited due to the recall bias and social desirability bias during the  
34  
35 44 data collection.

#### 36 37 38 39 45 **Funding statement**

40  
41  
42 46 This study was funded by Myungsung Medical College. However, the funder had no role in the  
43  
44 47 design, conduct, analysis and interpretation of this study.  
45  
46

#### 47 48 **Conflict of interest**

48  
49 49 The authors declare that they have no conflict of interests.  
50  
51

52  
53 50 **Word count** =2805  
54  
55

56 51  
57  
58  
59  
60

## 52 **Introduction**

53 Corona virus disease 2019 (COVID-19) is caused by severe acute respiratory syndrome corona  
54 virus 2 (SARS-CoV-2) also known as Novel coronavirus (nCoV) [1]. The first case of COVID-  
55 19 was discovered in Wuhan city, Hubei province of China with unexplained pneumonia on  
56 December 12, 2019 [2]. The virus is transmitted through large droplets generated during  
57 coughing or sneezing of symptomatic and asymptomatic patients [3]. Therefore, frequent hand-  
58 washing with soap and water, using alcohol based hand rub or sanitizer, avoidance of hand  
59 shaking/public gathering and use of face mask are crucial to halt the spread of COVID-19 [4].  
60 COVID-19 was declared a pandemic by the World health organization on March 11, 2020 [5].  
61 Since its emergence, this pandemic has shown its capability to spread rapidly in the world  
62 causing the most dramatic global health crisis of our time resulting in devastating social,  
63 economic and political crises [6].

64 Globally, more than 210 countries/territories have been affected by the virus, with more than  
65 one hundred twenty six million people being infected and 2.7 million deaths reported as of  
66 March 26, 2021. Ethiopia ranks 68<sup>th</sup> regarding COVID-19 with more than 194, 000 infected and  
67 2,741 dead (March 26, 2021) [7]. Unfortunately, Ethiopia was found to be one of five African  
68 countries with the highest case burden of COVID-19 [7]. Although, the government of Ethiopia  
69 has been striving to spread information on COVID-19 preventive measures via television, radio  
70 or social media outlets and declared a state of emergency, still the public is not consistently  
71 adhering to the precautions [8].

72 Currently, COVID-19 vaccine has been made available but it is highly controversial. More than  
73 seven billion doses have been pre-purchased by countries and organizations of the world, of

74 which more than half was sold-out to high income countries [9]. This figure is threatening to  
75 the global health as may be an indication of the disparities on the health delivery globally.

76 Myths and conspiracy theories on vaccinations have been spreading and can easily be accepted  
77 by the developing world. This may cause people to be reluctant and maleficent towards  
78 vaccination, which has been demonstrated by a study in Nigeria by a low vaccine acceptability  
79 rate [10]. WHO defined vaccine hesitancy as it is a difficulty in accepting or an outright refusal  
80 of vaccines, despite their availability. In 2019, before the COVID-19 pandemic, the World  
81 Health Organization listed vaccine hesitancy as one of the ten global threats to public health  
82 [11].

83 Hence, it is crucial to understand the varying vaccine attitudes among the community to design  
84 a strategy to overcome the vaccine hesitancy. Furthermore, unraveling the specific fears and  
85 doubts of the community with regards to receiving the vaccine can help government and other  
86 concerned officials to adequately address the misconceptions and various conspiracy theories in  
87 their campaigns. Therefore, the aim of this study was to assess the level of COVID-19 vaccine  
88 acceptability among the population in Addis Ababa; the capital city of Ethiopia.

## 90 **Methods and Materials**

### 91 **Study design and participants**

92 A concurrent mixed-methods study (QUAN + qual) was conducted from January 20 – 31, 2021  
93 among adult population ( $\geq 18$  years) currently residing in Akaki Kaliti sub city of Addis Ababa,  
94 Ethiopia. The quantitative part of the study was addressed by a cross-sectional study design and  
95 the qualitative part of the study was addressed by a phenomenological study design. The



1  
2  
3 96 qualitative part was mainly intended to explain the reasons for COVID-19 vaccine hesitancy, as  
4  
5 97 a supplementary of the quantitative study.  
6  
7

8 98 A sample size for the quantitative part of the study ( $n = 422$ ) was determined by using a single  
9  
10 99 population proportion formula, by taking 95% confidence interval, 5% margin of error, 50%  
11  
12 100 proportion of vaccine hesitancy and adding up 10% non-response rate. For the qualitative part,  
13  
14 101 24 participants were included into the study based on the information saturation of the  
15  
16 102 researchers.  
17  
18

19  
20 103 Multi-stage sampling technique was employed to recruit the participants for the quantitative part  
21  
22 104 of the study. There were 13 districts in the sub-city; of which three of them were selected  
23  
24 105 randomly (lottery method). The total sample was allocated proportionally to the districts. Then,  
25  
26 106 the households from each district were selected by employing a systematic random sampling  
27  
28 107 (sampling interval = every 4<sup>th</sup> house). From the specific selected households, only one randomly  
29  
30 108 selected eligible individual was interviewed. For the qualitative part of the study, purposive  
31  
32 109 sampling method was used to recruit participants who have reach information.  
33  
34  
35

### 36 37 110 **Patients and public involvement**

38  
39  
40 111 Neither patients nor the public was involved in the study.  
41  
42

### 43 112 **Data collection tools and procedures**

44  
45 113 Data was collected by using a semi-structured questionnaire which was adapted from reviewed  
46  
47 114 literatures [10, 12, 13]. The questionnaire has 5 components: socio-demographic, knowledge  
48  
49 115 towards COVID-19, attitude towards COVID-19, practice of COVID-19 prevention measures,  
50  
51 116 and COVID-19 vaccine acceptance. The questionnaire was in English and translated into  
52  
53 117 Amharic for the interview. The questionnaire was administered face-to-face by the medical  
54  
55  
56  
57  
58  
59  
60

1  
2  
3 118 interns. For the qualitative part of the study, in-depth interviews were made by the investigators  
4  
5 119 by using an in-depth interview guide.  
6  
7

## 8 120 **Data management and analysis**

9  
10 121 Data was coded and entered into SPSS-for windows version 25 for analysis. Frequency and  
11  
12 122 proportions were used to summarize categorical variables, whereas mean and standard deviation  
13  
14 123 were used to summarize continuous variables.  
15  
16  
17

18 124 The primary outcome variable of the study was COVID-19 vaccine hesitancy which was  
19  
20 125 assessed by asking a question “Will you get vaccinated if you get COVID-19 vaccine?” then the  
21  
22 126 response was dichotomized as “Yes” or “No”. Knowledge of COVID-19 was assessed by 15  
23  
24 127 yes or no knowledge-based questions. Then, the knowledge score was categorized in two as  
25  
26 128 below or above the mean score. The mean and below knowledge score was considered as poor  
27  
28 129 knowledge while above the mean was considered as good knowledge. Attitude towards  
29  
30 130 COVID-19 and its preventive measures was assessed by 11 questions which was in three Likert  
31  
32 131 scale (agree, neutral, disagree) then mean score was calculated. Then, the attitude score was  
33  
34 132 categorized in two as below or above the mean score. The mean and below attitude score was  
35  
36 133 considered as negative attitude while above the mean was considered as positive attitude [10,  
37  
38 134 12, 13].  
39  
40  
41  
42  
43

44 135 Multivariable binary logistic regression analysis was carried out to identify factors associated  
45  
46 136 with vaccine hesitancy, as expressed by adjusted odds ratio (aOR) along with its respective 95%  
47  
48 137 confidence interval (CI). Variables with  $<0.25$  in bivariate analysis were considered for  
49  
50 138 multivariable analysis. Variables having  $P$  value  $<0.05$  were considered statistically significant.  
51  
52

53 139 Multicollinearity was assessed by the collinearity diagnostics (Variance Inflation Factor and the  
54  
55 140 tolerance test). Goodness of the model was checked by the Hosmer Lemshow goodness of fit  
56  
57  
58

1  
2  
3 141 test. The qualitative data analysis was initiated by transcription and translating of the interviews,  
4  
5 142 then coded and analyzed by thematic analysis. The findings of the qualitative study were used to  
6  
7  
8 143 supplement the findings of quantitative data.  
9

### 10 11 144 **Ethical consideration**

12  
13 145 Ethical approval of this study was obtained from the Institutional Review Board (IRB) of  
14  
15 146 Myungsung Medical College. The participants of the study were informed about the purpose of  
16  
17 147 the study and provided their written consent. At the end of the interview, the data collectors  
18  
19  
20 148 have provided information with regard to the COVID-19 vaccine.  
21  
22

## 23 24 149 **Results**

### 25 26 27 150 **Socio-demographic characteristics**

28  
29 151 A total of 409 participants completed the questionnaire, with a response rate of 96.9%. Majority  
30  
31 152 of the participants 294 (71.9%) were females and married (62.3%) (Table 1). The mean age of  
32  
33 153 the participants was 34.1 years ( $\pm 12.9$ ), ranging from 18 - 85 years.  
34  
35  
36

### 37 154 **Knowledge and attitude towards COVID-19 preventive measures**

38  
39 155 Almost all of the participants heard about COVID-19 from Mass-media. However, the average  
40  
41 156 knowledge score was  $56.7 \pm 3.7$ , with 46.7% (n=191) exhibited poor level of knowledge. The  
42  
43 157 mean attitude score was found to be  $20.3 \pm 1.2$ , with 51.8% of the participants have negative  
44  
45 158 attitude towards COVID-19 and its preventive measures.  
46  
47  
48

49 159 This results were corroborated by the findings on the qualitative part of the study where the  
50  
51 160 majority of the participants stated that they were initially very concerned but now they were less  
52  
53 161 so. Some participants stated that they did not believe the disease exists anymore since they have  
54  
55 162 not personally encountered an infected person.  
56  
57  
58

1  
2  
3 163 Participants stated the following to show how they perceive about COVID-19:  
4  
5

6 164 *“I am not scared because I expected this to happen; we brought this on ourselves and*  
7  
8 165 *we are paying for our sins. It has been long time coming.” [Female, 50 year old]*  
9  
10

11 166 *“I have been through an outbreak before...I got sick and I had to be isolated from my*  
12  
13 167 *family but I recovered easily and I don’t believe this would be any different.” [Female,*  
14  
15 168 *47 year old]*  
16  
17

18 169 *“I was afraid that everyone in Ethiopia would die because even developed country*  
19  
20 170 *people could not handle it. I think the only reason we have survived is because Ethiopia*  
21  
22 171 *is God’s country.” [Female, 70 year old]*  
23  
24  
25

## 26 27 172 **COVID-19 vaccine hesitancy**

28

29 173 More than 90% of the participants heard about the COVID-19 vaccine mainly from Mass-  
30  
31 174 media. However, 78 (19.1%) were not willing to get vaccinated when it becomes available  
32  
33 175 (Figure 1). Out of them, 43.6% don’t take the vaccine due to fear of side effects and 41.0% of  
34  
35 176 them believe that the vaccine may be biological weapon (Figure 2).  
36  
37  
38

39 177 In the qualitative in-depth interview, some stated they did not have enough information about  
40  
41 178 the vaccine and wanted to see other people take it first. Majority of the participants feared it  
42  
43 179 would not be effective or have too many side effects. A few of the participants thought that the  
44  
45 180 vaccine that will be distributed in Africa would be of lower quality. Others thought it would be  
46  
47 181 used as a biological weapon by the developed nations to cause infertility and control the  
48  
49 182 population of poor countries. Moreover, it was also mentioned that the vaccines might be used  
50  
51 183 as a weapon to insert microchips into the body as the “mark of the beast” that would cause them  
52  
53  
54  
55  
56  
57  
58  
59  
60

184 to forsake their faith. A few others did not think they needed the vaccine because they had  
185 God's protection.

186 *"I don't think the vaccine will come to this country and even if it does I don't need it;*  
187 *God will be my vaccine." [Female, 45 year old]*

188 Close to 20% of the participants thought that children should not get vaccinated. Some of the  
189 participants did not recommend the vaccine to children even though they would take it  
190 themselves. These participants further expressed in the in depth interview that they thought the  
191 virus did not affect children or it would be too dangerous for them.

## 192 **Factors associated with vaccine hesitancy**

193 In the multi-variable analysis (Table 2), COVID-19 vaccine hesitancy was associated with sex,  
194 attitude and primary source of information about the vaccine. It was found that the odds of  
195 vaccine hesitancy was 1.97 times (aOR=1.97; 95% CI: 1.10 - 3.89) higher among female  
196 participants as compared to male participants. The odds of vaccine hesitancy was 1.75  
197 (aOR=1.75; 95% CI:1.08 - 3.02) times higher in those participants who were found to have a  
198 negative attitude towards COVID-19 and its preventive measures as compared to those who had  
199 a positive attitude. Similarly, the odds of vaccine hesitancy was 3.6 times (aOR=3.59; 95% CI:  
200 1.75 - 7.37) higher among those participants that received their information from social media  
201 (internet) as compared to those who received information only from mass-media.

## 202 **Discussion**

203 For the COVID-19 battle, the population adherence to preventive measures is crucial; however,  
204 it is mainly affected by their KAP toward the disease [1]. The findings of this study showed that  
205 nearly half of the study participants demonstrated inadequate knowledge of COVID-19,

1  
2  
3 206 indicating a great knowledge gap. This finding is higher than studies conducted in other parts of  
4  
5 207 Ethiopia such as Arbaminch (23.5%) and Gedeo (39.5%), and other low income countries such  
6  
7  
8 208 as Ghana (34.9%), and Malaysia (22.7%) [14-17]. The discrepancies might be due to  
9  
10 209 differences in the community awareness creation through mass media and social media. Further,  
11  
12 210 in our study, more than half of the participants had negative attitude towards COVID-19 and its  
13  
14 211 preventive measures, which is higher than the findings of studies conducted in Southern  
15  
16 212 Ethiopia [15, 18] and lower than study done among Dessie and Kombolcha town residents in  
17  
18 213 Ethiopia [19]. The discrepancy in the findings may be due to differences in the study period.  
19  
20 214 The later studies were conducted earlier in the pandemic when the declaration and enforcement  
21  
22 215 of state of emergency and other measures were still in place. Our findings show a significant  
23  
24 216 decrease in the community's attitude towards COVID-19 and its prevention measures which can  
25  
26 217 lead people to become discouraged to consistently adhere to the measures set forth by the  
27  
28 218 government and the World Health Organization. These findings of the study has an implication  
29  
30 219 on the public health and underscore the need for urgent concerted efforts to consistently  
31  
32 220 promote the knowledge of the general public in Ethiopia towards COVID-19 preventive  
33  
34 221 measures. If the current trend evidenced by this study continues in Ethiopia, COVID-19 will  
35  
36 222 pose a devastating outcome on the medical, financial and social aspect of citizens besides the  
37  
38 223 potential for new strains of disease developing.

39  
40 224 As COVID-19 continues to ravage the world, vaccination offers the most reliable hope for a  
41  
42 225 permanent solution to controlling the pandemic. However, a vaccine must be accepted and used  
43  
44 226 by a large majority of the population to create herd immunity [20]. The findings of this study  
45  
46 227 showed that about one out of five participants are not willing to receive COVID-19 vaccine  
47  
48 228 when it is available, which is higher than the findings reported from developed countries such as  
49  
50  
51  
52  
53  
54  
55  
56  
57  
58  
59  
60

1  
2  
3 229 UK (3%) [9, 21, 22]. The discrepancies might be due to insufficient knowledge about the  
4  
5 230 vaccine and difference in the perception of the seriousness of the pandemic. This implies that if  
6  
7 231 the doubts and fears of the majority regarding the vaccine are not addressed properly, we may  
8  
9 232 not be able to attain herd immunity. Surprisingly, the finding of this study was lower than a  
10  
11 233 study conducted in the US (31%) and Nigeria (80%) [13, 20]. This might be due to difference in  
12  
13 234 access to wide variety of conspiracy theories and doubts via internet.  
14  
15

16  
17 235 Consistent to the study conducted in China [23], vaccine hesitancy was more likely among  
18  
19 236 females as compared to males in our study. This could be due to higher exposure of males for  
20  
21 237 different media as compared to females in Ethiopia. In the present study, increased likelihood of  
22  
23 238 vaccine hesitancy was also indicated among those with negative attitude towards COVID-19  
24  
25 239 and its preventive measures. The qualitative aspects of this study also found that those  
26  
27 240 participants who would not take the vaccine stated one of their reason to be their lack of implicit  
28  
29 241 trust in the government and in health professionals. Thus, this lack of confidence in the  
30  
31 242 government exhibited by 41.8% of our participants may be a potential hurdle we might face  
32  
33 243 during the vaccination programs in Ethiopia.  
34  
35  
36  
37  
38

39 244 In our study, those participants who received their information from social media (internet)  
40  
41 245 were more likely to have vaccine hesitancy as compared to those who got their information only  
42  
43 246 from TV/radio. This finding of the study is in line with a study conducted to assess health  
44  
45 247 protective behaviors and conspiracy theories during the pandemic found that there was  
46  
47 248 significant association between holding a conspiracy belief and checking social media for news  
48  
49 249 of COVID-19 [24]. As a result, this finding is justified by our findings on both the quantitative  
50  
51 250 and qualitative aspects of our study which found that the majority of the reasons given for  
52  
53 251 hesitancy towards the vaccine were the belief in the conspiracy theories. Thus, the spared of  
54  
55  
56  
57  
58  
59  
60

1  
2  
3 252 these conspiracy theories is a potential issue that can cause problems when vaccine distribution  
4  
5 253 starts in Ethiopia. Particularly, if these conspiracy theories start getting a wider audience thus  
6  
7  
8 254 there may be a need to act in haste and find a solution before this issue worsens.  
9

10  
11 255 This study is the first community based study to assess the Ethiopian community's perception  
12  
13 256 towards COVID-19 vaccine and its level of acceptance. We employed a mixed methods design  
14  
15 257 which enables us to make the deep understanding of the issue. However, the study might be  
16  
17  
18 258 limited due to the recall bias and social desirability bias during the data collection. In addition to  
19  
20 259 this, our sample over-represents female population because the majority of the study  
21  
22 260 participants that were found at home during data collection time were housewives. Therefore,  
23  
24  
25 261 generalization of the study results needs to be cautious.  
26  
27

## 28 262 **Conclusions**

29  
30  
31 263 A considerable proportion of the people have concerns of the COVID-19 vaccine and unwilling  
32  
33 264 to accept once it is available. Several conspiracy theories were put forth to justify their stance  
34  
35  
36 265 and this was mainly due to the misconceptions distributed from the use of social media as  
37  
38  
39 266 primary source of information about the vaccine. These findings of the study underscore the  
40  
41 267 need to use social-media as a way to disseminate reliable information with regard to COVID-19  
42  
43 268 vaccination and the preventive measures, rather than only focusing on the mass-media  
44  
45 269 messages. Overall, providing the community with health education and consistent government  
46  
47  
48 270 efforts in uphold the prevention measures are of paramount importance to tackle this pandemic.  
49

## 50 271 **List of Abbreviations**

51  
52  
53  
54 272 aOR: Adjusted Odds Ratio  
55  
56  
57  
58  
59  
60



1  
2  
3 273 CI: Confidence Interval  
4  
5

6 274 COR: Crude Odds Ratio  
7  
8

9 275 SARS: Severe Acute Respiratory Syndrome  
10  
11

12 276 UK: United Kingdom  
13  
14

15 277 US: United States  
16  
17

18  
19 278 **Declarations**  
20

21  
22 279 **Consent for publication**  
23

24 280 Not applicable  
25  
26

27 281 **Availability of data and material**  
28

29  
30 282 Data are available upon reasonable request from the corresponding author.  
31  
32

33 283 **Competing interests**  
34

35 284 The authors declare that they have no competing interests.  
36  
37

38 285 **Authors Contributions**  
39

40 286 N.D., A.T., B.T., and D.A. conceptualized the study, designed the methodology, analyzed the  
41  
42 287 data, interpreted the results and drafted the initial manuscript and approved the final manuscript.  
43  
44

45 288 H.A., N.T., S.G., T.B., and Y.L. conceptualized the study, visualized the data, involved in data  
46  
47 289 analysis and interpretation and approved the final manuscript. All authors have read and  
48  
49 290 approved the manuscript.  
50  
51  
52  
53  
54  
55  
56  
57  
58  
59  
60

1  
2  
3 291 **Acknowledgements**  
4

5 292 The authors would like to thank Myungsung Medical College for providing fund to conduct this  
6  
7 293 study. The authors are grateful to the study participants for their contributions.  
8  
9

10  
11 294 **Ethics approval statement**  
12

13 295 Ethical approval of this study was obtained from the Institutional Review Board (IRB) of  
14  
15 296 Myungsung Medical College. The participants of the study were informed about the purpose of  
16  
17 297 the study and provided their written consent. At the end of the interview, the data collectors  
18  
19 298 have provided information with regard to the COVID-19 vaccine.  
20  
21

22 299  
23  
24  
25  
26  
27  
28  
29  
30  
31  
32  
33  
34  
35  
36  
37  
38  
39  
40  
41  
42  
43  
44  
45  
46  
47  
48  
49  
50  
51  
52  
53  
54  
55  
56  
57  
58  
59  
60

**Reference**

1. World Health Organization. Coronavirus disease 2019 (COVID-19): situation report, 82. 2020.
2. Imai N, Dorigatti I, Cori A, Donnelly C, Riley S, Ferguson N. Report 2: Estimating the potential total number of novel Coronavirus cases in Wuhan City, China. 2020.
3. Rothe C, Schunk M, Sothmann P, Bretzel G, Froeschl G, Wallrauch C, et al. Transmission of 2019-nCoV infection from an asymptomatic contact in Germany. *New England journal of medicine*. 2020;382(10):970-1.
4. Ranney ML, Griffeth V, Jha AK. Critical supply shortages—the need for ventilators and personal protective equipment during the Covid-19 pandemic. *New England Journal of Medicine*. 2020;382(18):e41.
5. Assessment RR. Coronavirus disease 2019 (COVID-19) in the EU/EEA and the UK—ninth update. European Centre for Disease Prevention and Control: Stockholm. 2020.
6. COVID C. Global Cases by the Center for Systems Science and Engineering (CSSE) at Johns Hopkins University (JHU). JHU COVID-19 Resource Center. Johns Hopkins Coronavirus Resource Center. 2020.
7. Worldometer. Coronavirus Update (Live): Cases and Deaths from COVID-19 Virus Pandemic 2021 [cited 2021 Feb 24]. Available from: <https://www.worldometers.info/coronavirus/>.
8. Zikargae MH. COVID-19 in Ethiopia: Assessment of How the Ethiopian Government has Executed Administrative Actions and Managed Risk Communications and Community Engagement. *Risk management and healthcare policy*. 2020;13:2803.

- 1  
2  
3 322 9. Bell S, Clarke R, Mounier-Jack S, Walker JL, Paterson P. Parents' and guardians' views  
4  
5 323 on the acceptability of a future COVID-19 vaccine: A multi-methods study in England.  
6  
7 324 Vaccine. 2020;38(49):7789-98.
- 8  
9  
10 325 10. Reuben RC, Danladi MM, Saleh DA, Ejembi PE. Knowledge, attitudes and practices  
11  
12 326 towards COVID-19: an epidemiological survey in North-Central Nigeria. Journal of community  
13  
14 327 health. 2020:1-14.
- 15  
16  
17 328 11. Graffigna G, Palamenghi L, Boccia S, Barelo S. Relationship between citizens' health  
18  
19 329 engagement and intention to take the covid-19 vaccine in italy: A mediation analysis. Vaccines.  
20  
21 330 2020;8(4):576.
- 22  
23  
24 331 12. Ma L, Liu H, Tao Z, Jiang N, Wang S, Jiang X. Knowledge, Beliefs/Attitudes, and  
25  
26 332 practices of rural residents in the prevention and control of COVID-19: an online questionnaire  
27  
28 333 survey. The American journal of tropical medicine and hygiene. 2020;103(6):2357-67.
- 29  
30  
31 334 13. Enitan S, Oyekale A, Akele R, Olawuyi K, Olabisi E, Nwankiti A. Assessment of  
32  
33 335 Knowledge, Perception and Readiness of Nigerians to participate in the COVID-19 Vaccine  
34  
35 336 Trial. International Journal of Vaccines and Immunization. 2020;4:1-13.
- 36  
37  
38 337 14. Aweke Z, Jemal B, Mola S, Hussen R. Knowledge of COVID-19 and its prevention  
39  
40 338 among residents of the Gedeo zone, South Ethiopia. Sources of information as a factor. Current  
41  
42 339 Medical Research and Opinion. 2020;36(12):1955-60.
- 43  
44  
45 340 15. Nigussie TF, Azmach NN. Knowledge, attitude and practice towards covid-19 among  
46  
47 341 Arba Minch town, southern Ethiopia. GSJ. 2020;8(6).
- 48  
49 342 16. Nkansah C, Serwaa D, Adarkwah LA, Osei-Boakye F, Mensah K, Tetteh P, et al. Novel  
50  
51 343 coronavirus disease 2019: knowledge, practice and preparedness: a survey of healthcare  
52  
53 344 workers in the Offinso-North District, Ghana. The Pan African Medical Journal. 2020;35(79).

- 1  
2  
3 345 17. Mohamad EM, Azlan AA, Hamzah MR, Tham JS, Ayub SH. Public knowledge,  
4  
5 346 attitudes and practices towards COVID-19: A cross-sectional study in Malaysia. medRxiv.  
6  
7 347 2020.  
8  
9  
10 348 18. Mola S, Aweke Z, Jemal B, Hussein R, Hailu S, Neme D, et al. Magnitude and  
11  
12 349 associated factors for attitude and practice of Southern Ethiopian residents toward COVID-19  
13  
14 350 and its preventions: A community based cross sectional study. 2020.  
15  
16  
17 351 19. Kassa AM, Mekonen AM, Yesuf KA, Tadesse AW, Bogale GG. Knowledge level and  
18  
19 352 factors influencing prevention of COVID-19 pandemic among residents of Dessie and  
20  
21 353 Kombolcha City administrations, North-East Ethiopia: a population-based cross-sectional study.  
22  
23 354 BMJ open. 2020;10(11):e044202.  
24  
25  
26 355 20. Pogue K, Jensen JL, Stancil CK, Ferguson DG, Hughes SJ, Mello EJ, et al. Influences  
27  
28 356 on attitudes regarding potential COVID-19 vaccination in the United States. Vaccines.  
29  
30 357 2020;8(4):582.  
31  
32  
33 358 21. Harapan H, Wagner AL, Yufika A, Winardi W, Anwar S, Gan AK, et al. Acceptance of  
34  
35 359 a COVID-19 vaccine in southeast Asia: A cross-sectional study in Indonesia. Frontiers in public  
36  
37 360 health. 2020;8.  
38  
39  
40 361 22. Salali GD, Uysal MS. COVID-19 vaccine hesitancy is associated with beliefs on the  
41  
42 362 origin of the novel coronavirus in the UK and Turkey. Psychological medicine. 2020:1-3.  
43  
44  
45 363 23. Wang J, Jing R, Lai X, Zhang H, Lyu Y, Knoll MD, et al. Acceptance of COVID-19  
46  
47 364 Vaccination during the COVID-19 Pandemic in China. Vaccines. 2020;8(3):482.  
48  
49 365 24. Allington D, Duffy B, Wessely S, Dhavan N, Rubin J. Health-protective behaviour,  
50  
51 366 social media usage and conspiracy belief during the COVID-19 public health emergency.  
52  
53 367 Psychological medicine. 2020:1-7.  
54  
55  
56  
57  
58  
59  
60

1  
2  
3 368  
4  
5

6 369 **Figure captions**  
7

8  
9 370 Figure 1: COVID-19 vaccine acceptance  
10

11 371 Figure 2: Reasons of participant for refusing COVID-19 vaccination  
12

13 372  
14  
15  
16  
17  
18  
19  
20  
21  
22  
23  
24  
25  
26  
27  
28  
29  
30  
31  
32  
33  
34  
35  
36  
37  
38  
39  
40  
41  
42  
43  
44  
45  
46  
47  
48  
49  
50  
51  
52  
53  
54  
55  
56  
57  
58  
59  
60

For peer review only

373 Table 1: Socio-demographic characteristics of the study participants

|                    |                      | Frequency (N) | Percent (%) |
|--------------------|----------------------|---------------|-------------|
| Sex                | Male                 | 115           | 28.1%       |
|                    | Female               | 294           | 71.9%       |
| Age                | 18-29                | 174           | 42.5%       |
|                    | 30-40                | 147           | 35.9%       |
|                    | 41-50                | 40            | 9.8%        |
|                    | >50                  | 48            | 11.7%       |
| Marital status     | Not married          | 123           | 30.1%       |
|                    | Married              | 255           | 62.3%       |
|                    | Widowed              | 20            | 4.9%        |
|                    | Divorced             | 11            | 2.7%        |
| Religion           | Christian            | 349           | 85.3%       |
|                    | Muslim               | 60            | 14.7%       |
| Educational status | No formal education  | 39            | 9.5%        |
|                    | Primary school       | 105           | 25.7%       |
|                    | Secondary and above  | 265           | 64.8%       |
| Occupation         | Unemployed/housewife | 190           | 46.5%       |
|                    | Employed             | 219           | 53.5%       |
| Monthly income*    | ≤3200 ETB (≤100 USD) | 175           | 42.8%       |
|                    | >3200 ETB (>100 USD) | 228           | 57.2%       |

374 ETB: Ethiopian Birr USD: United States Dollar \*6 participants' data missing

375

376 *Table 2: Factors associated with COVID-19 vaccine hesitancy in Addis Ababa, Ethiopia, 2021*

| Variables                 | Vaccine hesitancy |             | cOR (95% CI)     | aOR(95% CI)      | P value |
|---------------------------|-------------------|-------------|------------------|------------------|---------|
|                           | Yes (%)           | No (%)      |                  |                  |         |
| <b>Sex</b>                |                   |             |                  |                  |         |
| Male                      | 17 (21.8%)        | 98 (29.6%)  | 1.00             | 1.00             | 0.03    |
| Female                    | 61 (78.2%)        | 233 (70.4%) | 1.49 (0.83-2.69) | 1.97 (1.10-3.89) |         |
| <b>Age</b>                |                   |             |                  |                  |         |
| 18-29                     | 34 (43.6%)        | 140 (42.3%) | 1.00             | 1.00             | 0.934   |
| 30-40                     | 24 (30.8%)        | 122 (36.9%) | 0.81 (0.46-1.44) | 1.03 (0.55-1.92) |         |
| 41-50                     | 12 (15.4%)        | 29 (8.8%)   | 1.77 (0.82-3.82) | 2.22 (0.94-5.21) |         |
| >50                       | 8 (10.2%)         | 40 (12.0%)  | 0.82 (0.35-1.92) | 1.08 (0.39-2.97) |         |
| <b>Religion</b>           |                   |             |                  |                  |         |
| Christian                 | 8 (10.3%)         | 52 (15.7%)  | 1.00             | 1.00             | 0.621   |
| Muslim                    | 70 (89.7%)        | 278 (84.3%) | 1.64 (0.74-3.60) | 1.23 (0.54-2.83) |         |
| <b>Educational status</b> |                   |             |                  |                  |         |
| No formal education       | 9 (11.5%)         | 30 (9.1%)   | 1.11 (0.50-2.48) | 1.11 (0.39-3.16) | 0.840   |
| Primary education         | 13 (16.7%)        | 93 (28.1%)  | 0.53 (0.27-1.01) | 0.81 (0.40-1.63) | 0.560   |
| Secondary and above       | 56 (71.8%)        | 208 (62.8%) | 1.00             | 1.00             |         |
| <b>Attitude</b>           |                   |             |                  |                  |         |
| Positive attitude         | 28 (35.9%)        | 169 (51.1%) | 1.00             | 1.00             |         |



|                                      |            |             |                  |                  |        |
|--------------------------------------|------------|-------------|------------------|------------------|--------|
| Negative attitude                    | 50 (64.1%) | 162 (48.9%) | 1.87 (1.12-3.12) | 1.75 (1.08-3.02) | 0.04   |
| <b>Primary source of information</b> |            |             |                  |                  |        |
| TV/Radio                             | 38 (48.7%) | 255 (77.0%) | 1.00             | 1.00             |        |
| Social media<br>(internet)           | 40 (51.3%) | 76 (23.0%)  | 3.53 (1.67-6.98) | 3.59 (1.75-7.37) | 0.0001 |

377

378

379

For peer review only

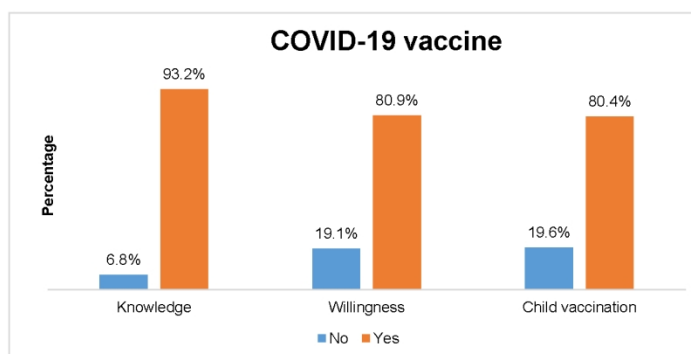

Figure 1: COVID-19 vaccine acceptance

215x279mm (200 x 200 DPI)

1  
2  
3  
4  
5  
6  
7  
8  
9  
10  
11  
12  
13  
14  
15  
16  
17  
18  
19  
20  
21  
22  
23  
24  
25  
26  
27  
28  
29  
30  
31  
32  
33  
34  
35  
36  
37  
38  
39  
40  
41  
42  
43  
44  
45  
46  
47  
48  
49  
50  
51  
52  
53  
54  
55  
56  
57  
58  
59  
60

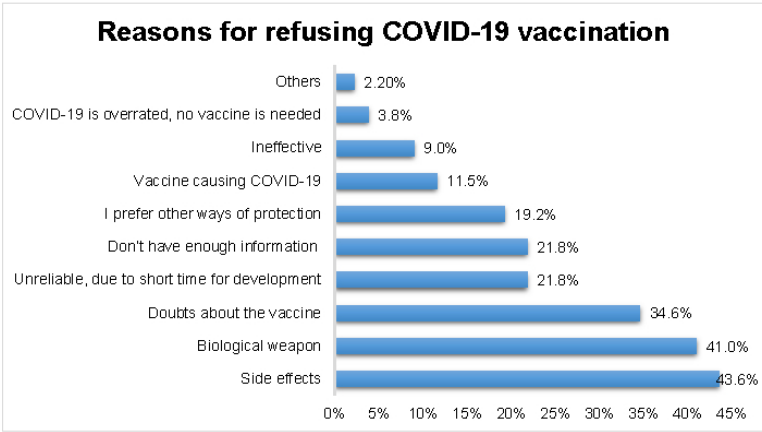

Figure 2: Reasons of participant for refusing COVID-19 vaccination  
215x279mm (102 x 100 DPI)

## STROBE Statement—checklist of items that should be included in reports of observational studies

|                              | Item No. | Recommendation                                                                                                                                                                                                                                                                                                                                                                                                                                                         | Page No.                                                                                       |  |
|------------------------------|----------|------------------------------------------------------------------------------------------------------------------------------------------------------------------------------------------------------------------------------------------------------------------------------------------------------------------------------------------------------------------------------------------------------------------------------------------------------------------------|------------------------------------------------------------------------------------------------|--|
| <b>Title and abstract</b>    | 1        | (a) Indicate the study's design with a commonly used term in the title or the abstract                                                                                                                                                                                                                                                                                                                                                                                 | Title page, Page No.1                                                                          |  |
|                              |          | (b) Provide in the abstract an informative and balanced summary of what was done and what was found                                                                                                                                                                                                                                                                                                                                                                    | Abstract, Page No.2                                                                            |  |
| <b>Introduction</b>          |          |                                                                                                                                                                                                                                                                                                                                                                                                                                                                        |                                                                                                |  |
| Background/rationale         | 2        | Explain the scientific background and rationale for the investigation being reported                                                                                                                                                                                                                                                                                                                                                                                   | Introduction, Page No. 4                                                                       |  |
| Objectives                   | 3        | State specific objectives, including any prespecified hypotheses                                                                                                                                                                                                                                                                                                                                                                                                       | Introduction, Page No. 5                                                                       |  |
| <b>Methods</b>               |          |                                                                                                                                                                                                                                                                                                                                                                                                                                                                        |                                                                                                |  |
| Study design                 | 4        | Present key elements of study design early in the paper                                                                                                                                                                                                                                                                                                                                                                                                                | Methods, Page No. 6                                                                            |  |
| Setting                      | 5        | Describe the setting, locations, and relevant dates, including periods of recruitment, exposure, follow-up, and data collection                                                                                                                                                                                                                                                                                                                                        | Methods, Page No. 6                                                                            |  |
| Participants                 | 6        | (a) <i>Cohort study</i> —Give the eligibility criteria, and the sources and methods of selection of participants. Describe methods of follow-up<br><i>Case-control study</i> —Give the eligibility criteria, and the sources and methods of case ascertainment and control selection. Give the rationale for the choice of cases and controls<br><i>Cross-sectional study</i> —Give the eligibility criteria, and the sources and methods of selection of participants | Methods, Page No. 6                                                                            |  |
|                              |          | (b) <i>Cohort study</i> —For matched studies, give matching criteria and number of exposed and unexposed<br><i>Case-control study</i> —For matched studies, give matching criteria and the number of controls per case                                                                                                                                                                                                                                                 | N/A                                                                                            |  |
| Variables                    | 7        | Clearly define all outcomes, exposures, predictors, potential confounders, and effect modifiers. Give diagnostic criteria, if applicable                                                                                                                                                                                                                                                                                                                               | Methods, Data management and analysis, Page No. 7 and 8                                        |  |
| Data sources/<br>measurement | 8*       | For each variable of interest, give sources of data and details of methods of assessment (measurement). Describe comparability of assessment methods if there is more than one group                                                                                                                                                                                                                                                                                   | Methods, Data tools and procedures, Page No. 7                                                 |  |
| Bias                         | 9        | Describe any efforts to address potential sources of bias                                                                                                                                                                                                                                                                                                                                                                                                              | Methods, Data tools and procedures, Page No. 7; Data management and analysis, Page No. 7 and 8 |  |
| Study size                   | 10       | Explain how the study size was arrived at                                                                                                                                                                                                                                                                                                                                                                                                                              | Methods, Page No. 5                                                                            |  |
| Quantitative variables       | 11       | Explain how quantitative variables were handled in the analyses. If applicable, describe which groupings were chosen and why                                                                                                                                                                                                                                                                                                                                           | Methods, Data management and analysis, Page No. 7 and 8                                        |  |

|                     |     |                                                                                                                                                                                                                                                                                                           |                                                         |  |
|---------------------|-----|-----------------------------------------------------------------------------------------------------------------------------------------------------------------------------------------------------------------------------------------------------------------------------------------------------------|---------------------------------------------------------|--|
| Statistical methods | 12  | (a) Describe all statistical methods, including those used to control for confounding                                                                                                                                                                                                                     | Methods, Data management and analysis, Page No. 7 and 8 |  |
|                     |     | (b) Describe any methods used to examine subgroups and interactions                                                                                                                                                                                                                                       | Methods, Data management and analysis, Page No. 7 and 8 |  |
|                     |     | (c) Explain how missing data were addressed                                                                                                                                                                                                                                                               | N/A                                                     |  |
|                     |     | (d) <i>Cohort study</i> —If applicable, explain how loss to follow-up was addressed<br><i>Case-control study</i> —If applicable, explain how matching of cases and controls was addressed<br><i>Cross-sectional study</i> —If applicable, describe analytical methods taking account of sampling strategy | N/A                                                     |  |
|                     |     | (e) Describe any sensitivity analyses                                                                                                                                                                                                                                                                     | N/A                                                     |  |
| <b>Results</b>      |     |                                                                                                                                                                                                                                                                                                           |                                                         |  |
| Participants        | 13* | (a) Report numbers of individuals at each stage of study—eg numbers potentially eligible, examined for eligibility, confirmed eligible, included in the study, completing follow-up, and analysed                                                                                                         | N/A                                                     |  |
|                     |     | (b) Give reasons for non-participation at each stage                                                                                                                                                                                                                                                      | N/A                                                     |  |
|                     |     | (c) Consider use of a flow diagram                                                                                                                                                                                                                                                                        | N/A                                                     |  |
| Descriptive data    | 14* | (a) Give characteristics of study participants (eg demographic, clinical, social) and information on exposures and potential confounders                                                                                                                                                                  | Results, Page No. 9 and 10                              |  |
|                     |     | (b) Indicate number of participants with missing data for each variable of interest                                                                                                                                                                                                                       | N/A                                                     |  |
|                     |     | (c) <i>Cohort study</i> —Summarise follow-up time (eg, average and total amount)                                                                                                                                                                                                                          | N/A                                                     |  |
| Outcome data        | 15* | <i>Cohort study</i> —Report numbers of outcome events or summary measures over time                                                                                                                                                                                                                       | N/A                                                     |  |
|                     |     | <i>Case-control study</i> —Report numbers in each exposure category, or summary measures of exposure                                                                                                                                                                                                      |                                                         |  |
|                     |     | <i>Cross-sectional study</i> —Report numbers of outcome events or summary measures                                                                                                                                                                                                                        | Results, Page No. 9 and 10                              |  |
| Main results        | 16  | (a) Give unadjusted estimates and, if applicable, confounder-adjusted estimates and their precision (eg, 95% confidence interval). Make clear which confounders were adjusted for and why they were included                                                                                              | Results, Page No. 9 and 10                              |  |
|                     |     | (b) Report category boundaries when continuous variables were categorized                                                                                                                                                                                                                                 | N/A                                                     |  |
|                     |     | (c) If relevant, consider translating estimates of relative risk into absolute risk for a meaningful time period                                                                                                                                                                                          | N/A                                                     |  |

Continued on next page

|                          |    |                                                                                                                                                                            |                                |  |
|--------------------------|----|----------------------------------------------------------------------------------------------------------------------------------------------------------------------------|--------------------------------|--|
| Other analyses           | 17 | Report other analyses done—eg analyses of subgroups and interactions, and sensitivity analyses                                                                             | N/A                            |  |
| <b>Discussion</b>        |    |                                                                                                                                                                            |                                |  |
| Key results              | 18 | Summarise key results with reference to study objectives                                                                                                                   | Discussion, Page No. 10        |  |
| Limitations              | 19 | Discuss limitations of the study, taking into account sources of potential bias or imprecision. Discuss both direction and magnitude of any potential bias                 | Discussion, Page No. 12        |  |
| Interpretation           | 20 | Give a cautious overall interpretation of results considering objectives, limitations, multiplicity of analyses, results from similar studies, and other relevant evidence | Conclusions, Page No. 12       |  |
| Generalisability         | 21 | Discuss the generalisability (external validity) of the study results                                                                                                      | Discussion, Page No. 12        |  |
| <b>Other information</b> |    |                                                                                                                                                                            |                                |  |
| Funding                  | 22 | Give the source of funding and the role of the funders for the present study and, if applicable, for the original study on which the present article is based              | Source of funding, Page No. 14 |  |

\*Give information separately for cases and controls in case-control studies and, if applicable, for exposed and unexposed groups in cohort and cross-sectional studies.

**Note:** An Explanation and Elaboration article discusses each checklist item and gives methodological background and published examples of transparent reporting. The STROBE checklist is best used in conjunction with this article (freely available on the Web sites of PLoS Medicine at <http://www.plosmedicine.org/>, Annals of Internal Medicine at <http://www.annals.org/>, and Epidemiology at <http://www.epidem.com/>). Information on the STROBE Initiative is available at [www.strobe-statement.org](http://www.strobe-statement.org).

# BMJ Open

## COVID-19 vaccine hesitancy in Addis Ababa, Ethiopia: A mixed-methods study

|                                 |                                                                                                                                                                                                                                                                                                                                                                                                                                                                                                                                                                                                                                               |
|---------------------------------|-----------------------------------------------------------------------------------------------------------------------------------------------------------------------------------------------------------------------------------------------------------------------------------------------------------------------------------------------------------------------------------------------------------------------------------------------------------------------------------------------------------------------------------------------------------------------------------------------------------------------------------------------|
| Journal:                        | <i>BMJ Open</i>                                                                                                                                                                                                                                                                                                                                                                                                                                                                                                                                                                                                                               |
| Manuscript ID                   | bmjopen-2021-052432.R1                                                                                                                                                                                                                                                                                                                                                                                                                                                                                                                                                                                                                        |
| Article Type:                   | Original research                                                                                                                                                                                                                                                                                                                                                                                                                                                                                                                                                                                                                             |
| Date Submitted by the Author:   | 07-Mar-2022                                                                                                                                                                                                                                                                                                                                                                                                                                                                                                                                                                                                                                   |
| Complete List of Authors:       | Dereje, Nebiyu; MyungSung Medical College, Department of Public Health<br>Tsfaye, Abigel; MyungSung Medical College, Department of Medicine<br>Tamene, Beamlak; MyungSung Medical College, Department of Medicine<br>Alemeshet, Dina; MyungSung Medical College, Department of Medicine<br>Abe, Haymanot; MyungSung Medical College, Department of Medicine<br>Tesfa, Nathnael; MyungSung Medical College, Department of Medicine<br>Gedion, Saron; MyungSung Medical College, Department of Medicine<br>Biruk, Tigist; MyungSung Medical College, Department of Medicine<br>Lakew, Yabets; MyungSung Medical College, Department of Medicine |
| <b>Primary Subject Heading</b>: | Public health                                                                                                                                                                                                                                                                                                                                                                                                                                                                                                                                                                                                                                 |
| Secondary Subject Heading:      | Epidemiology                                                                                                                                                                                                                                                                                                                                                                                                                                                                                                                                                                                                                                  |
| Keywords:                       | COVID-19, Public health < INFECTIOUS DISEASES, EPIDEMIOLOGY                                                                                                                                                                                                                                                                                                                                                                                                                                                                                                                                                                                   |
|                                 |                                                                                                                                                                                                                                                                                                                                                                                                                                                                                                                                                                                                                                               |

SCHOLARONE™  
Manuscripts

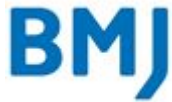

I, the Submitting Author has the right to grant and does grant on behalf of all authors of the Work (as defined in the below author licence), an exclusive licence and/or a non-exclusive licence for contributions from authors who are: i) UK Crown employees; ii) where BMJ has agreed a CC-BY licence shall apply, and/or iii) in accordance with the terms applicable for US Federal Government officers or employees acting as part of their official duties; on a worldwide, perpetual, irrevocable, royalty-free basis to BMJ Publishing Group Ltd ("BMJ") its licensees and where the relevant Journal is co-owned by BMJ to the co-owners of the Journal, to publish the Work in this journal and any other BMJ products and to exploit all rights, as set out in our [licence](#).

The Submitting Author accepts and understands that any supply made under these terms is made by BMJ to the Submitting Author unless you are acting as an employee on behalf of your employer or a postgraduate student of an affiliated institution which is paying any applicable article publishing charge ("APC") for Open Access articles. Where the Submitting Author wishes to make the Work available on an Open Access basis (and intends to pay the relevant APC), the terms of reuse of such Open Access shall be governed by a Creative Commons licence – details of these licences and which [Creative Commons](#) licence will apply to this Work are set out in our licence referred to above.

Other than as permitted in any relevant BMJ Author's Self Archiving Policies, I confirm this Work has not been accepted for publication elsewhere, is not being considered for publication elsewhere and does not duplicate material already published. I confirm all authors consent to publication of this Work and authorise the granting of this licence.



1  
2  
3 **1 COVID-19 vaccine hesitancy in Addis Ababa, Ethiopia: A mixed-methods study**  
4

5  
6 2 Nebiyu Dereje<sup>1\*</sup>, Abigel Tesfaye<sup>2</sup>, Beamlak Tamene<sup>2</sup>, Dina Alemeshet<sup>2</sup>, Haymanot Abe<sup>2</sup>,  
7  
8 3 Nathnael Tesfa<sup>2</sup>, Saron Gedion<sup>2</sup>, Tigist Biruk<sup>2</sup>, Yabets Lakew<sup>2</sup>  
9

10  
11 4 <sup>1</sup>Department of Public Health, Myungsung Medical College, Addis Ababa, Ethiopia  
12

13  
14 5 <sup>2</sup>Department of Medicine, Myungsung Medical College, Addis Ababa, Ethiopia  
15

16  
17 6 \*Corresponding author contact information  
18

19  
20 7 Nebiyu Dereje  
21

22  
23 8 Email: [neba.jahovy@gmail.com](mailto:neba.jahovy@gmail.com)  
24

25  
26 9 P.O.Box 14972  
27

28  
29 10 Addis Ababa, Ethiopia  
30

31  
32 11  
33  
34  
35  
36  
37  
38  
39  
40  
41  
42  
43  
44  
45  
46  
47  
48  
49  
50  
51  
52  
53  
54  
55  
56  
57  
58  
59  
60

## 12 Abstract

13 **Objective:** Data on COVID-19 vaccine hesitancy is limited in Ethiopia and other parts of  
14 Africa. Therefore, the aim of this study was to determine the level of COVID-19 vaccine  
15 hesitancy and its associated factors in Addis Ababa, Ethiopia.

16 **Design:** A community-based concurrent mixed-methods study

17 **Setting:** In a community setting

18 **Participants:** Adult residents (n = 422) of Akaki Kaliti sub-city who were recruited by a multi-  
19 stage sampling technique and 24 adults who were selected purposively were included for the  
20 quantitative and qualitative part of the study respectively.

21 **Outcome Measures:** Data were collected by face-to-face interview using a semi-structured  
22 questionnaire. Factors associated with COVID-19 vaccine hesitancy were identified by  
23 multivariable binary logistic regression model.

24 **Results:** One out five (19.1%, 95% CI: 15.3% - 24.6%) participants were not willing to get  
25 vaccinated. In the multivariable analysis, vaccine hesitancy was significantly associated with  
26 being female (aOR=1.97; 95% CI: 1.10 - 3.89), having negative attitude towards COVID-19  
27 and its preventive measures (aOR=1.75; 95% CI: 1.08 - 3.02), and primary information source  
28 being social media (internet) (aOR=3.59; 95% CI: 1.75 - 7.37). Study participants have  
29 predominantly stated that they did not have enough information about the vaccine, feared it  
30 would not be effective or have too many side effects, and reflected their uncertainty towards the  
31 quality of the vaccine.

1  
2  
3 32 **Conclusions:** A considerable proportion of the people in Addis Ababa have concerns on  
4  
5 33 COVID-19 vaccines and unwilling to accept them. This was due to the misconceptions,  
6  
7 34 negative attitudes, and use of social media as their primary source of information. Providing the  
8  
9 35 community with health education and consistent efforts to enhance the prevention measures are  
10  
11 36 important, particularly using different medias including social media.  
12  
13  
14  
15

16 37 **Key Words:** COVID-19, knowledge, attitude, Vaccine, Hesitancy  
17  
18

## 19 38 **Article Summary**

### 20 39 **Strengths and limitations of this study**

- 21 40 • We employed a community-based study which could reflect the prevailing COVID 19  
22 41 vaccine hesitancy in the general population.
- 23 42 • A mixed-methods approach allows for triangulation of findings from different  
24 43 perspectives.
- 25 44 • Factors associated with the outcome variable (vaccine hesitancy) were adjusted for the  
26 45 known explanatory variables.
- 27 46 • The study might be limited due to the social desirability bias during the data collection.  
28  
29  
30  
31  
32  
33  
34  
35  
36  
37  
38  
39  
40  
41

### 42 47 **Funding statement**

43  
44 48 This study was funded by Myungsung Medical College. However, the funder had no role in the  
45  
46 49 design, conduct, analysis and interpretation of this study.  
47  
48  
49

### 50 50 **Conflict of interest**

51 51 The authors declare that they have no conflict of interests.  
52  
53  
54

55 52 **Word count** =2868  
56  
57  
58  
59  
60

1  
2  
3  
4  
5  
6  
7  
8  
9  
10  
11  
12  
13  
14  
15  
16  
17  
18  
19  
20  
21  
22  
23  
24  
25  
26  
27  
28  
29  
30  
31  
32  
33  
34  
35  
36  
37  
38  
39  
40  
41  
42  
43  
44  
45  
46  
47  
48  
49  
50  
51  
52  
53  
54  
55  
56  
57  
58  
59  
60

53

For peer review only

## 54 **Introduction**

55 Corona virus disease 2019 (COVID-19) is caused by severe acute respiratory syndrome corona  
56 virus 2 (SARS-CoV-2) also known as Novel coronavirus (nCoV) [1]. Since its emergence, this  
57 pandemic has shown its capability to spread rapidly in the world causing the most dramatic  
58 global health crisis of our time resulting in devastating social, economic and political crises [2].  
59 Therefore, on top of other preventive measures, it is crucial to receive COVID vaccines to halt  
60 the spread of COVID-19 [3].

61 Globally, more than 210 countries/territories have been affected by the virus, and Ethiopia is  
62 one of the five African countries with the highest case burden of COVID-19 [4]. Although, the  
63 government of Ethiopia has been striving to spread information on COVID-19 preventive  
64 measures, still the public is not consistently adhering to the precautions [5]. On the other hand,  
65 although the COVID-19 vaccines have been made available, it is highly controversial, as they  
66 are highly affected by disparities of access and distributions across the countries, where large  
67 proportions of the vaccines have been already sold-out to high-income countries [6].

68 Moreover, myths and conspiracy theories on vaccinations have been spreading and can easily be  
69 accepted by the developing world. This may cause people to be reluctant towards vaccination,  
70 which has been demonstrated by a study in Nigeria by a low vaccine acceptability rate [7].  
71 Furthermore, the World Health Organization listed vaccine hesitancy as one of the ten global  
72 threats to public health [8].

73 Some recent studies have also reported the magnitude of vaccine hesitancy varying from 76.4%  
74 to 3.0%, indicating variabilities across different countries [9 – 11]. This variability could be  
75 partly due to varying perceptions and attitudes towards the efficacy, quality and safety of the

1  
2  
3 76 COVID vaccines. Vaccine hesitancy could also be affected by the socio-demographic,  
4  
5 77 psychological and cultural factors of the population. Therefore, it is imperative to understand  
6  
7 78 the varying vaccine attitudes among the community to design strategies to overcome the  
8  
9 79 vaccine hesitancy. Furthermore, unraveling the specific fears and doubts of the community with  
10  
11 80 regards to receiving the vaccine can help government and other concerned officials to  
12  
13 81 adequately address the misconceptions and various conspiracy theories in their campaigns.  
14  
15  
16  
17

## 18 82 **Methods and Materials**

### 19 20 21 83 **Study design and participants**

22  
23 84 A concurrent mixed-methods study (QUAN + qual) was conducted from January 20 – 31, 2021  
24  
25 85 among adult population ( $\geq 18$  years) currently residing in Akaki Kality sub city of Addis Ababa,  
26  
27 86 Ethiopia. The quantitative part of the study was addressed by a cross-sectional study design and  
28  
29 87 the qualitative part of the study was addressed by a phenomenological study design. The  
30  
31 88 qualitative part was mainly intended to explain the reasons for COVID-19 vaccine hesitancy, as  
32  
33 89 a supplementary of the quantitative part.  
34  
35  
36  
37

38 90 A sample size for the quantitative part of the study ( $n = 422$ ) was determined by using a single  
39  
40 91 population proportion formula, by taking 95% confidence interval, 5% margin of error, 50%  
41  
42 92 proportion of vaccine hesitancy and adding up 10% non-response rate. For the qualitative part,  
43  
44 93 24 participants were included into the study based on the information saturation of the  
45  
46 94 researchers.  
47  
48  
49

50 95 Two-stage sampling technique was employed to recruit the participants for the quantitative part  
51  
52 96 of the study. There were 13 districts in the sub-city; of which three of them were selected  
53  
54 97 randomly (lottery method). The total sample was allocated proportionally to the districts. Then,  
55  
56  
57  
58  
59  
60

1  
2  
3 98 the households from each district were selected by employing a systematic random sampling  
4  
5 99 (sampling interval = every 4<sup>th</sup> house). From the specific selected households, only one randomly  
6  
7  
8 100 selected eligible individual was interviewed. For the qualitative part of the study, purposive  
9  
10 101 sampling method was used to recruit participants who have reach information.

### 12 13 102 **Patients and public involvement**

14  
15  
16 103 Neither patients nor the public was involved in the study.

### 17 18 19 104 **Data collection tools and procedures**

20  
21 105 Data was collected by using a semi-structured questionnaire which was adapted from reviewed  
22  
23 106 literatures [7, 12, 13]. The contents of the questionnaire were validated by senior experts in the  
24  
25  
26 107 field. The questionnaire has 4 components: socio-demographic, knowledge towards COVID-19,  
27  
28 108 attitude towards COVID-19, and COVID-19 vaccine acceptance. The questionnaire was first  
29  
30 109 prepared in English and translated into Amharic (local language) for the sake of interview. The  
31  
32  
33 110 questionnaire was administered face-to-face by trained medical interns. For the qualitative part  
34  
35 111 of the study, in-depth interviews were made by the investigators by using an in-depth interview  
36  
37 112 guide (supplementary file 1).

### 38 39 40 113 **Data management and analysis**

41  
42  
43 114 Data was checked for completeness and consistency, coded and entered into SPSS-for windows  
44  
45 115 version 25 for analysis. Frequency and proportions were used to summarize categorical  
46  
47 116 variables, whereas mean and standard deviation were used to summarize continuous variables.

48  
49  
50 117 The primary outcome variable of the study was COVID-19 vaccine hesitancy which was  
51  
52 118 assessed by asking a question “Will you get vaccinated if you get COVID-19 vaccine?” then the  
53  
54  
55 119 response was dichotomized as “Yes” or “No”. Knowledge of COVID-19 was assessed by 15

1  
2  
3 120 yes or no knowledge-based questions. Then, the knowledge score was categorized in two as  
4  
5 121 below or above the mean score. The mean and below knowledge score was considered as poor  
6  
7 122 knowledge while above the mean was considered as good knowledge. Attitude towards  
8  
9 123 COVID-19 and its preventive measures was assessed by 11 questions which was in three Likert  
10  
11 124 scale (agree, neutral, disagree) then mean score was calculated. Then, the attitude score was  
12  
13 125 categorized in two as below or above the mean score. The mean and below attitude score was  
14  
15 126 considered as negative attitude while above the mean was considered as positive attitude [7, 12,  
16  
17 127 13].  
18  
19  
20  
21

22 128 Multivariable binary logistic regression analysis was carried out to identify factors associated  
23  
24 129 with vaccine hesitancy, as expressed by adjusted odds ratio (aOR) along with its respective 95%  
25  
26 130 confidence interval (CI). Variables with  $<0.25$  in bivariate analysis were considered for  
27  
28 131 multivariable analysis. The explanatory variables entered into the multivariable model include  
29  
30 132 sex, age, educational status, religion, attitude and primary source of information. Variables  
31  
32 133 having  $P$  value  $<0.05$  were considered statistically significant. Multicollinearity was assessed by  
33  
34 134 the collinearity diagnostics (Variance Inflation Factor (2.30) and the tolerance test (0.43)).  
35  
36 135 Goodness of the model was checked by the Hosmer Lemshow goodness of fit test, and it was  
37  
38 136 not significant ( $P$  value = 0.81). The qualitative data analysis was initiated by transcription and  
39  
40 137 translating of the interviews, then coded and analyzed by thematic analysis. The findings of the  
41  
42 138 qualitative study were used to supplement the findings of quantitative data.  
43  
44  
45  
46  
47

### 48 139 **Ethical consideration**

49  
50  
51 140 Ethical approval of this study was obtained from the Institutional Review Board (IRB) of  
52  
53 141 Myungsung Medical College (MMC/IRB/067/21). The participants of the study were informed  
54  
55  
56  
57  
58  
59  
60



1  
2  
3 142 about the purpose of the study and provided their written consent. At the end of the interview,  
4  
5 143 the data collectors have provided information regarding the COVID-19 vaccine.  
6  
7

## 8 9 144 **Results**

### 10 11 12 145 **Socio-demographic characteristics**

13  
14 146 A total of 409 participants completed the questionnaire, with a response rate of 96.9%. Majority  
15  
16 147 of the participants 294 (71.9%) were females and married (62.3%) (Table 1). The mean ( $\pm$  SD)  
17  
18 148 age of the participants was 34.1 years ( $\pm$ 12.9), ranging from 18 - 85 years.  
19  
20  
21

### 22 149 **Knowledge and attitude towards COVID-19 preventive measures**

23  
24 150 Almost all the participants heard about COVID-19 from Mass-media. However, the average ( $\pm$   
25  
26 151 SD) knowledge score was  $56.7 \pm 3.7$ , with 46.7% (n=191) exhibited poor level of knowledge.  
27  
28 152 The mean ( $\pm$  SD) attitude score was found to be  $20.3 \pm 1.2$ , with 51.8% of the participants had  
29  
30 153 negative attitude towards COVID-19 and its preventive measures.  
31  
32  
33

34 154 These results were corroborated by the findings of the qualitative part of the study where  
35  
36 155 participants stated that they were initially very concerned about getting infected with COVID-  
37  
38 156 19. Paradoxically, participants also stated that they did not believe on the existence of the  
39  
40 157 disease since they have not personally encountered an infected person. On the other hand,  
41  
42 158 believing COVID-19 disease as if it was emanated because of the punishment of God was  
43  
44 159 predominantly explained by the participants.  
45  
46  
47  
48

49 160 Participants stated the following to show how they perceived about COVID-19:  
50  
51

52 161 *“I am not scared because I expected this to happen; we brought this on ourselves, and*  
53  
54 162 *we are paying for our sins. It has been long time coming.” [Female, 50-year-old]*  
55  
56  
57  
58  
59  
60

1  
2  
3 163 *“I have been through an outbreak before...I got sick, and I had to be isolated from my*  
4  
5 164 *family, but I recovered easily, and I don’t believe this would be any different.” [Female,*  
6  
7  
8 165 *47-year-old]*

9  
10  
11 166 *“I was afraid that everyone in Ethiopia would die because even developed country*  
12  
13 167 *people could not handle it. I think the only reason we have survived is because Ethiopia*  
14  
15 168 *is God’s country.” [Female, 70-year-old]*

### 18 169 **COVID-19 vaccine hesitancy and its associated factors**

19  
20  
21 170 More than 90% of the participants heard about the COVID-19 vaccine mainly from Mass-  
22  
23 171 media. However, 78 (19.1%, 95% CI: 15.3% - 24.6%) were not willing to get vaccinated. Out  
24  
25 172 of them, 43.6% don’t take the vaccine due to fear of side effects and 41.0% of them believe that  
26  
27 173 the vaccine may be biological weapon (Figure 1).

28  
29  
30  
31 174 In the qualitative in-depth interview, participants stated that they did not have enough  
32  
33 175 information about the vaccine and wanted to see other people take it first. For instance, a young  
34  
35 176 man said that:

36  
37  
38 177 *“...frankly speaking, I do not have adequate information about the COVID vaccine,*  
39  
40 178 *and for sure I will not receive it until I see others take it first...” [Male, 32-year-old]*

41  
42  
43 179 Participants also described their concerns over the effectiveness and quality of the vaccines.

44  
45  
46 180 *“I fear that the vaccines might not be effective or of a lower quality, particularly*  
47  
48 181 *those vaccines distributed to Africa. They may also have serious side effects, as they did*  
49  
50 182 *not take longer time in laboratories or in trials before they are released for use.” [Male,*  
51  
52 183 *45-year-old]*

184

185 Other predominant thought expressed by the participants was the vaccines would be used by the  
186 developed nations to cause infertility and control the population size of poor countries. For  
187 example, participants stated that:

188 *“...I saw some videos circulating on social media stating that the vaccines are made  
189 to reduce the population size of the poor countries...” [Female, 35-year-old]*

190 Moreover, it was also mentioned that the vaccines might be used as a weapon to insert  
191 microchips into the body as the “mark of the beast” that would cause them to forsake their faith.

192 *“...it seems the end of the world is near...as it is stated in the Bible, during the end  
193 times the mark of the beast will be labelled on the people...I fear these vaccines may be  
194 associated to this...” [Male, 40-year-old]*

195 A few others did not think they needed the vaccine because they had God’s protection.

196 *“I don’t think the vaccine will come to this country and even if it does, I don’t need  
197 it; God will be my vaccine.” [Female, 45-year-old]*

198 In the multi-variable analysis (Table 2), COVID-19 vaccine hesitancy was associated with  
199 being female, having negative attitude towards the vaccine and primary source of information  
200 about the vaccine being social media. The odds of vaccine hesitancy was 2 times (aOR=1.97;  
201 95% CI: 1.10 - 3.89) higher among female participants as compared to male participants, 1.8  
202 times (aOR=1.75; 95% CI: 1.08 - 3.02) higher among participants who have negative attitudes  
203 towards COVID-19 as compared to those who had positive attitudes, and 4 times (aOR=3.59;

1  
2  
3 204 95% CI: 1.75 - 7.37) higher among those participants who got information from social media as  
4  
5 205 a primary source as compared to those who received information only from mass-media.  
6  
7

## 8 9 206 **Discussion**

10  
11 207 For the COVID-19 battle, the population adherence to preventive measures and receiving  
12  
13 208 COVID vaccines is crucial; however, it is mainly affected by their knowledge and attitude  
14  
15 209 towards the disease and vaccination [1]. The findings of this study showed that nearly half of  
16  
17 210 the study participants demonstrated inadequate knowledge of COVID-19, indicating a great  
18  
19 211 knowledge gap. This finding is higher than studies conducted in other parts of Ethiopia such as  
20  
21 212 Arbaminch (23.5%) and Gedeo (39.5%), and other countries such as Ghana (34.9%), and  
22  
23 213 Malaysia (22.7%) [14-17]. The discrepancies might be due to differences in the community  
24  
25 214 awareness creation through mass media and social media. Further, in our study, more than half  
26  
27 215 of the participants had negative attitude towards COVID-19 and its preventive measures, which  
28  
29 216 is higher than the findings of studies conducted in Southern Ethiopia [15, 18] and lower than  
30  
31 217 study done among Dessie and Kombolcha town residents in Ethiopia [19]. The discrepancy in  
32  
33 218 the findings may be due to differences in the study period. The later studies were conducted  
34  
35 219 earlier in the pandemic when the declaration and enforcement of state of emergency and other  
36  
37 220 measures were still in place. Our findings show a significant decrease in the community's  
38  
39 221 attitude towards COVID-19 and its prevention measures which can lead people to become  
40  
41 222 discouraged to consistently adhere to the measures set forth by the government and the World  
42  
43 223 Health Organization. These findings of the study have an implication on the public health and  
44  
45 224 underscore the need for urgent concerted efforts to consistently promote the knowledge of the  
46  
47 225 public in Ethiopia towards COVID-19 preventive measures, including COVID vaccination. If  
48  
49 226 the current trend evidenced by this study continues in Ethiopia, COVID-19 will pose a  
50  
51  
52  
53  
54  
55  
56  
57  
58  
59  
60

1  
2  
3 227 devastating outcome on the medical, financial and social aspect of citizens besides the potential  
4  
5 228 for new strains of disease developing.  
6  
7

8 229 As COVID-19 continues to ravage the world, vaccination offers the most reliable hope for a  
9  
10 230 permanent solution to controlling the pandemic. However, a vaccine must be accepted and used  
11  
12 231 by a large majority of the population to create herd immunity [20]. The findings of this study  
13  
14 232 showed that about one out of five participants are not willing to receive COVID-19 vaccine  
15  
16 233 when it is available, which is higher than the findings reported from developed countries such as  
17  
18 234 UK (3%) [6 21, 22]. The discrepancies might be due to insufficient knowledge about the  
19  
20 235 vaccine and difference in the perception of the seriousness of the pandemic. This implies that if  
21  
22 236 the doubts and fears of the majority regarding the vaccine are not addressed properly, we may  
23  
24 237 not be able to attain herd immunity. Surprisingly, the finding of this study was lower than a  
25  
26 238 study conducted in the US (31%) and Nigeria (80%) [13, 20]. This might be due to difference in  
27  
28 239 access to wide variety of conspiracy theories and doubts via internet.  
29  
30  
31  
32  
33

34 240 Consistent to the study conducted in China [23], vaccine hesitancy was more likely among  
35  
36 241 females as compared to males in our study. This could be due to higher exposure of males for  
37  
38 242 different media as compared to females in Ethiopia. In the present study, increased likelihood of  
39  
40 243 vaccine hesitancy was also indicated among those with negative attitude towards COVID-19  
41  
42 244 and its preventive measures. The qualitative aspects of this study also found that those  
43  
44 245 participants who would not take the vaccine stated one of their reasons to be their lack of  
45  
46 246 implicit trust in the government and in health professionals. Thus, this lack of confidence in the  
47  
48 247 government exhibited by 41.8% of our participants may be a potential hurdle we might face  
49  
50 248 during the vaccination programs in Ethiopia.  
51  
52  
53  
54  
55  
56  
57  
58  
59  
60

1  
2  
3 249 In our study, those participants who received their information from social media (internet)  
4  
5 250 were more likely to have vaccine hesitancy as compared to those who got their information  
6  
7 251 from mass media (TV/radio). This finding of the study is in line with a study conducted to  
8  
9 252 assess health protective behaviors and conspiracy theories during the pandemic, which has  
10  
11 253 found a significant association between holding conspiracy beliefs and checking social media  
12  
13 254 for news of COVID-19 [24]. This finding of the study is justified by our findings on both the  
14  
15 255 quantitative and qualitative aspects of our study, which revealed the predominant reasons given  
16  
17 256 for vaccine hesitancy were associated with the participant's beliefs in the conspiracy theories.  
18  
19 257 Thus, the spread of these conspiracy theories is a potential issue that needs attention during  
20  
21 258 vaccination campaigns. It is critical to explicitly explain the details of the COVID vaccines  
22  
23 259 including its effectiveness, safety and quality to address the information need of the community.  
24  
25  
26  
27  
28  
29 260 This study is the first community-based study to assess the Ethiopian community's perception  
30  
31 261 towards COVID-19 vaccine and its level of acceptance. We employed a mixed-methods design  
32  
33 262 which enables us to make the deep understanding of the issue. However, the study might be  
34  
35 263 limited due to social desirability bias during the data collection. However, to minimize this bias,  
36  
37 264 the purpose of the study and assurance of the participant's anonymity were described to the  
38  
39 265 participants prior to the administration of the interview. In addition to this, our sample over-  
40  
41 266 represents female population because the majority of the study participants that were found at  
42  
43 267 home during data collection time were housewives. Furthermore, the study was conducted in  
44  
45 268 only one sub-city. Therefore, generalization of the study results needs to be cautious.  
46  
47  
48  
49  
50  
51  
52  
53  
54  
55  
56  
57  
58  
59  
60

## 269 **Conclusions**

270 A considerable proportion of the study participants in Addis Ababa have concerns on the  
271 COVID-19 vaccines and unwilling to accept them. This was mainly due to the prevailing  
272 misconceptions, negative attitudes, and use of social media as their primary source of  
273 information. Several conspiracy theories were put forth to justify their stance and this was  
274 mainly due to the misconceptions distributed from the use of social media as primary source of  
275 information about the vaccines. These findings of the study underscore the need to use social-  
276 media to disseminate reliable information regarding COVID-19 vaccination and the preventive  
277 measures, rather than only focusing on the mass-media messages. Overall, providing the  
278 community with health education and consistent government efforts in uphold the prevention  
279 measures are of paramount importance to tackle this pandemic.

## 280 **List of Abbreviations**

281 aOR: Adjusted Odds Ratio

282 CI: Confidence Interval

283 COR: Crude Odds Ratio

284 SARS: Severe Acute Respiratory Syndrome

285 UK: United Kingdom

286 US: United States

1  
2  
3 **287 Declarations**  
4  
5

6 **288 Consent for publication**  
7

8  
9 289 Not applicable  
10

11  
12 **290 Availability of data and material**  
13

14 291 Data are available upon reasonable request from the corresponding author.  
15

16  
17 **292 Competing interests**  
18

19 293 The authors declare that they have no competing interests.  
20  
21

22  
23 **294 Authors Contributions**  
24

25 295 N.D., A.T., B.T., and D.A. conceptualized the study, designed the methodology, analyzed the  
26

27 296 data, interpreted the results and drafted the initial manuscript and approved the final manuscript.  
28

29 297 H.A., N.T., S.G., T.B., and Y.L. conceptualized the study, visualized the data, involved in data  
30

31 298 analysis and interpretation and approved the final manuscript. All authors have read and  
32

33 299 approved the manuscript.  
34  
35

36  
37 **300 Acknowledgements**  
38

39 301 The authors would like to thank Myungsung Medical College for providing fund to conduct this  
40

41 302 study. The authors are grateful to the study participants for their contributions.  
42  
43  
44

45 **303 Ethics approval statement**  
46

47 304 Ethical approval of this study was obtained from the Institutional Review Board (IRB) of  
48

49 305 Myungsung Medical College (MMC/IRB/067/21). The participants of the study were informed  
50

51 306 about the purpose of the study and provided their written consent. At the end of the interview,  
52

53 307 the data collectors have provided information regarding the COVID-19 vaccines.  
54  
55  
56  
57  
58  
59  
60



1  
2  
3 **308 Reference**  
4  
5

- 6 309 1. World Health Organization. Coronavirus disease 2019 (COVID-19): situation report, 82.  
7  
8 310 2020.  
9  
10 311 2. COVID C. Global Cases by the Center for Systems Science and Engineering (CSSE) at  
11  
12 312 Johns Hopkins University (JHU). JHU COVID-19 Resource Center. Johns Hopkins  
13  
14 313 Coronavirus Resource Center. 2020.  
15  
16 314 3. Ranney ML, Griffeth V, Jha AK. Critical supply shortages—the need for ventilators and  
17  
18 315 personal protective equipment during the Covid-19 pandemic. *New England Journal of*  
19  
20 316 *Medicine*. 2020;382(18):e41.  
21  
22 317 4. Worldometer. Coronavirus Update (Live): Cases and Deaths from COVID-19 Virus  
23  
24 318 Pandemic 2021 [cited 2021 Feb 24]. Available from:  
25  
26 319 <https://www.worldometers.info/coronavirus/>.  
27  
28 320 5. Zikargae MH. COVID-19 in Ethiopia: Assessment of How the Ethiopian Government  
29  
30 321 has Executed Administrative Actions and Managed Risk Communications and  
31  
32 322 Community Engagement. *Risk management and healthcare policy*. 2020;13:2803.  
33  
34 323 6. Bell S, Clarke R, Mounier-Jack S, Walker JL, Paterson P. Parents' and guardians' views  
35  
36 324 on the acceptability of a future COVID-19 vaccine: A multi-methods study in England.  
37  
38 325 *Vaccine*. 2020;38(49):7789-98.  
39  
40 326 7. Reuben RC, Danladi MM, Saleh DA, Ejembi PE. Knowledge, attitudes and practices  
41  
42 327 towards COVID-19: an epidemiological survey in North-Central Nigeria. *Journal of*  
43  
44 328 *community health*. 2020:1-14.  
45  
46  
47  
48  
49  
50  
51  
52  
53  
54  
55  
56  
57  
58  
59  
60

- 1  
2  
3 329 8. Graffigna G, Palamenghi L, Boccia S, Barello S. Relationship between citizens' health  
4  
5 330 engagement and intention to take the covid-19 vaccine in italy: A mediation analysis.  
6  
7 331 Vaccines. 2020;8(4):576.  
8  
9  
10 332 9. Sallam M, Dababseh D, Eid H, Al-Mahzoum K, Al-Haidar A, Taim D, Yaseen A,  
11  
12 333 Ababneh NA, Bakri FG, Mahafzah A. High Rates of COVID-19 Vaccine Hesitancy and  
13  
14 334 Its Association with Conspiracy Beliefs: A Study in Jordan and Kuwait among Other  
15  
16 335 Arab Countries. Vaccines. 2021; 9(1):42. <https://doi.org/10.3390/vaccines9010042>  
17  
18  
19 336 10. Sallam M. COVID-19 Vaccine Hesitancy Worldwide: A Concise Systematic Review of  
20  
21 337 Vaccine Acceptance Rates. Vaccines (Basel). 2021;9(2):160. Published 2021 Feb 16.  
22  
23 338 [doi:10.3390/vaccines9020160](https://doi.org/10.3390/vaccines9020160)  
24  
25  
26 339 11. Sarasty O, Carpio CE, Hudson D, Guerrero-Ochoa PA, Borja I. The demand for a  
27  
28 340 COVID-19 vaccine in Ecuador. Vaccine. 2020;38(51):8090-8098.  
29  
30 341 [doi:10.1016/j.vaccine.2020.11.013](https://doi.org/10.1016/j.vaccine.2020.11.013)  
31  
32  
33 342 12. Ma L, Liu H, Tao Z, Jiang N, Wang S, Jiang X. Knowledge, Beliefs/Attitudes, and  
34  
35 343 practices of rural residents in the prevention and control of COVID-19: an online  
36  
37 344 questionnaire survey. The American journal of tropical medicine and hygiene.  
38  
39 345 2020;103(6):2357-67.  
40  
41  
42 346 13. Enitan S, Oyekale A, Akele R, Olawuyi K, Olabisi E, Nwankiti A. Assessment of  
43  
44 347 Knowledge, Perception and Readiness of Nigerians to participate in the COVID-19  
45  
46 348 Vaccine Trial. International Journal of Vaccines and Immunization. 2020;4:1-13.  
47  
48  
49 349 14. Aweke Z, Jemal B, Mola S, Hussen R. Knowledge of COVID-19 and its prevention  
50  
51 350 among residents of the Gedeo zone, South Ethiopia. Sources of information as a factor.  
52  
53 351 Current Medical Research and Opinion. 2020;36(12):1955-60.  
54  
55  
56  
57  
58  
59  
60

- 1  
2  
3 352 15. Nigussie TF, Azmach NN. Knowledge, attitude and practice towards covid-19 among  
4  
5 353 Arba Minch town, southern Ethiopia. *GSJ*. 2020;8(6).  
6  
7  
8 354 16. Nkansah C, Serwaa D, Adarkwah LA, Osei-Boakye F, Mensah K, Tetteh P, et al. Novel  
9  
10 355 coronavirus disease 2019: knowledge, practice and preparedness: a survey of healthcare  
11  
12 356 workers in the Offinso-North District, Ghana. *The Pan African Medical Journal*.  
13  
14 357 2020;35(79).  
15  
16  
17 358 17. Mohamad EM, Azlan AA, Hamzah MR, Tham JS, Ayub SH. Public knowledge,  
18  
19 359 attitudes and practices towards COVID-19: A cross-sectional study in Malaysia.  
20  
21 360 medRxiv. 2020.  
22  
23  
24 361 18. Mola S, Aweke Z, Jemal B, Hussein R, Hailu S, Neme D, et al. Magnitude and  
25  
26 362 associated factors for attitude and practice of Southern Ethiopian residents toward  
27  
28 363 COVID-19 and its preventions: A community based cross sectional study. 2020.  
29  
30  
31 364 19. Kassa AM, Mekonen AM, Yesuf KA, Tadesse AW, Bogale GG. Knowledge level and  
32  
33 365 factors influencing prevention of COVID-19 pandemic among residents of Dessie and  
34  
35 366 Kombolcha City administrations, North-East Ethiopia: a population-based cross-  
36  
37 367 sectional study. *BMJ open*. 2020;10(11):e044202.  
38  
39  
40 368 20. Pogue K, Jensen JL, Stancil CK, Ferguson DG, Hughes SJ, Mello EJ, et al. Influences  
41  
42 369 on attitudes regarding potential COVID-19 vaccination in the United States. *Vaccines*.  
43  
44 370 2020;8(4):582.  
45  
46  
47 371 21. Harapan H, Wagner AL, Yufika A, Winardi W, Anwar S, Gan AK, et al. Acceptance of  
48  
49 372 a COVID-19 vaccine in southeast Asia: A cross-sectional study in Indonesia. *Frontiers*  
50  
51 373 *in public health*. 2020;8.

- 1  
2  
3 374 22. Salali GD, Uysal MS. COVID-19 vaccine hesitancy is associated with beliefs on the  
4  
5 375 origin of the novel coronavirus in the UK and Turkey. *Psychological medicine*. 2020:1-  
6  
7 376 3.  
8  
9  
10 377 23. Wang J, Jing R, Lai X, Zhang H, Lyu Y, Knoll MD, et al. Acceptance of COVID-19  
11  
12 378 Vaccination during the COVID-19 Pandemic in China. *Vaccines*. 2020;8(3):482.  
13  
14  
15 379 24. Allington D, Duffy B, Wessely S, Dhavan N, Rubin J. Health-protective behaviour,  
16  
17 380 social media usage and conspiracy belief during the COVID-19 public health  
18  
19 381 emergency. *Psychological medicine*. 2020:1-7.  
20  
21  
22 382

23  
24  
25 **Figure captions**  
26

27  
28 384 Figure 1: Reasons of participants for refusing COVID-19 vaccination in Addis Ababa, Ethiopia  
29  
30 385  
31  
32  
33  
34  
35  
36  
37  
38  
39  
40  
41  
42  
43  
44  
45  
46  
47  
48  
49  
50  
51  
52  
53  
54  
55  
56  
57  
58  
59  
60

386 Table 1: Socio-demographic characteristics of the study participants

|                    |                      | Frequency (N) | Percent (%) |
|--------------------|----------------------|---------------|-------------|
| Sex                | Male                 | 115           | 28.1%       |
|                    | Female               | 294           | 71.9%       |
| Age                | 18-29                | 174           | 42.5%       |
|                    | 30-40                | 147           | 35.9%       |
|                    | 41-50                | 40            | 9.8%        |
|                    | >50                  | 48            | 11.7%       |
| Marital status     | Not married          | 123           | 30.1%       |
|                    | Married              | 255           | 62.3%       |
|                    | Widowed              | 20            | 4.9%        |
|                    | Divorced             | 11            | 2.7%        |
| Religion           | Christian            | 349           | 85.3%       |
|                    | Muslim               | 60            | 14.7%       |
| Educational status | No formal education  | 39            | 9.5%        |
|                    | Primary school       | 105           | 25.7%       |
|                    | Secondary and above  | 265           | 64.8%       |
| Occupation         | Unemployed/housewife | 190           | 46.5%       |
|                    | Employed             | 219           | 53.5%       |
| Monthly income*    | ≤3200 ETB (≤100 USD) | 175           | 42.8%       |
|                    | >3200 ETB (>100 USD) | 228           | 57.2%       |

387 ETB: Ethiopian Birr USD: United States Dollar \*6 participants' data missing

388

389 Table 2: Factors associated with COVID-19 vaccine hesitancy in Addis Ababa, Ethiopia, 2021

| Variables                 | Vaccine hesitancy |             | cOR (95% CI)     | aOR(95% CI)      | P value |
|---------------------------|-------------------|-------------|------------------|------------------|---------|
|                           | Yes (%)           | No (%)      |                  |                  |         |
| <b>Sex</b>                |                   |             |                  |                  |         |
| Male                      | 17 (21.8%)        | 98 (29.6%)  | 1.00             | 1.00             | 0.03    |
| Female                    | 61 (78.2%)        | 233 (70.4%) | 1.49 (0.83-2.69) | 1.97 (1.10-3.89) |         |
| <b>Age</b>                |                   |             |                  |                  |         |
| 18-29                     | 34 (43.6%)        | 140 (42.3%) | 1.00             | 1.00             | 0.934   |
| 30-40                     | 24 (30.8%)        | 122 (36.9%) | 0.81 (0.46-1.44) | 1.03 (0.55-1.92) |         |
| 41-50                     | 12 (15.4%)        | 29 (8.8%)   | 1.77 (0.82-3.82) | 2.22 (0.94-5.21) |         |
| >50                       | 8 (10.2%)         | 40 (12.0%)  | 0.82 (0.35-1.92) | 1.08 (0.39-2.97) |         |
| <b>Religion</b>           |                   |             |                  |                  |         |
| Christian                 | 8 (10.3%)         | 52 (15.7%)  | 1.00             | 1.00             | 0.621   |
| Muslim                    | 70 (89.7%)        | 278 (84.3%) | 1.64 (0.74-3.60) | 1.23 (0.54-2.83) |         |
| <b>Educational status</b> |                   |             |                  |                  |         |
| No formal education       | 9 (11.5%)         | 30 (9.1%)   | 1.11 (0.50-2.48) | 1.11 (0.39-3.16) | 0.840   |
| Primary education         | 13 (16.7%)        | 93 (28.1%)  | 0.53 (0.27-1.01) | 0.81 (0.40-1.63) | 0.560   |
| Secondary and above       | 56 (71.8%)        | 208 (62.8%) | 1.00             | 1.00             |         |
| <b>Attitude</b>           |                   |             |                  |                  |         |
| Positive attitude         | 28 (35.9%)        | 169 (51.1%) | 1.00             | 1.00             |         |

|                                      |            |             |                  |                  |        |
|--------------------------------------|------------|-------------|------------------|------------------|--------|
| Negative attitude                    | 50 (64.1%) | 162 (48.9%) | 1.87 (1.12-3.12) | 1.75 (1.08-3.02) | 0.04   |
| <b>Primary source of information</b> |            |             |                  |                  |        |
| TV/Radio                             | 38 (48.7%) | 255 (77.0%) | 1.00             | 1.00             |        |
| Social media<br>(internet)           | 40 (51.3%) | 76 (23.0%)  | 3.53 (1.67-6.98) | 3.59 (1.75-7.37) | 0.0001 |

390 cOR: Crude Odds Ratio

aOR: Adjusted Odds Ratio

391

392

For peer review only

1  
2  
3  
4  
5  
6  
7  
8  
9  
10  
11  
12  
13  
14  
15  
16  
17  
18  
19  
20  
21  
22  
23  
24  
25  
26  
27  
28  
29  
30  
31  
32  
33  
34  
35  
36  
37  
38  
39  
40  
41  
42  
43  
44  
45  
46  
47  
48  
49  
50  
51  
52  
53  
54  
55  
56  
57  
58  
59  
60

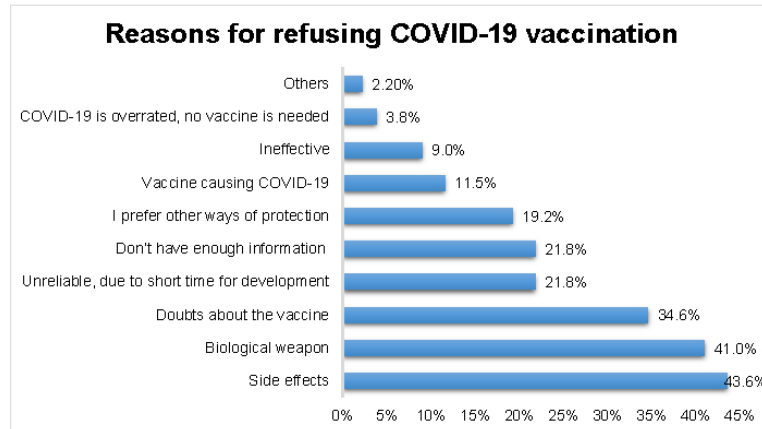

Figure 1: Reasons of participants for refusing COVID-19 vaccination in Addis Ababa, Ethiopia  
215x279mm (102 x 100 DPI)



## Questionnaire (English Version)

| <b>A. Sociodemographic</b>      |                       |                                                                                                                                                                                     |
|---------------------------------|-----------------------|-------------------------------------------------------------------------------------------------------------------------------------------------------------------------------------|
| 1                               | Gender:               | 1. Male<br>2. Female                                                                                                                                                                |
| 2                               | Age                   | ----- in years                                                                                                                                                                      |
| 3                               | Marital status        | 1. Single<br>2. Married<br>3. Widowed<br>4. Divorced                                                                                                                                |
| 4                               | Educational status    | 1. illiterate<br>2. can read and write<br>3. 1-8 <sup>th</sup> grade<br>4. 9-12 <sup>th</sup> grade<br>5. Technique<br>6. Higher education                                          |
| 5                               | Religion              | 1. Christian<br>2. Muslim<br>3. Other                                                                                                                                               |
|                                 | Occupation            | 1. Merchant<br>2. Gov't employee<br>3. Private employee<br>4. House wife<br>5. Daily laborer<br>6. Police/ Solidier<br>7. Unemployed<br>8. janitor<br>9. student<br>10. Other ----- |
| 6                               | Family monthly income | 1. ≤1650 ETB<br>2. 1651 – 3200 ETB<br>3. 3201 – 5800 ETB<br>4. 5801 – 7800 ETB<br>5. 7801 – 10400 ETB<br>6. >10400 ETB                                                              |
| <b>B. Source of information</b> |                       |                                                                                                                                                                                     |

|                                                                                                                            |                                                                     |                                                                                                                                                                                                                                                                                                                                                                                                          |
|----------------------------------------------------------------------------------------------------------------------------|---------------------------------------------------------------------|----------------------------------------------------------------------------------------------------------------------------------------------------------------------------------------------------------------------------------------------------------------------------------------------------------------------------------------------------------------------------------------------------------|
| 1<br>2<br>3<br>4<br>5<br>6<br>7<br>8<br>9<br>10<br>11<br>12                                                                | <b>What is the source of your information about COVID-19</b>        | <ol style="list-style-type: none"> <li>1. Social media (SNS)</li> <li>2. TV/Radio (New Media)</li> <li>3. Religious leaders</li> <li>4. Friends/ Family/ Neighbors</li> <li>5. Directly from healthcare workers</li> <li>6. Others-----</li> </ol>                                                                                                                                                       |
| 13<br>14<br>15                                                                                                             | <b>C. Knowledge</b> (please tick what is/are applicable)            |                                                                                                                                                                                                                                                                                                                                                                                                          |
| 16<br>17<br>18<br>19<br>20<br>21<br>22<br>23<br>24<br>25<br>26<br>27<br>28<br>29<br>30                                     | 1<br><b>Mode of transmission:</b>                                   | <ol style="list-style-type: none"> <li>1. Respiratory droplets</li> <li>2. Airborne</li> <li>3. Fecal-Oral route</li> <li>4. Blood transmission</li> <li>5. Contact with contaminated surfaces</li> <li>6. Contaminated food</li> <li>7. Contact with a COVID-19 positive patient</li> <li>8. Skin contact</li> <li>9. Breast milk</li> <li>10. Vertical transmission</li> </ol>                         |
| 31<br>32<br>33<br>34<br>35<br>36<br>37<br>38<br>39<br>40<br>41<br>42<br>43<br>44<br>45<br>46<br>47<br>48<br>49<br>50<br>51 | 2<br><b>Symptoms</b> (that can be expected from a Covid-19 patient) | <ol style="list-style-type: none"> <li>1. Fever</li> <li>2. Muscle pain</li> <li>3. Fatigue</li> <li>4. Diarrhea</li> <li>5. Sneezing</li> <li>6. Loss of smell</li> <li>7. Vomiting</li> <li>8. Runny nose</li> <li>9. Shortness of Breath</li> <li>10. Cough</li> <li>11. Loss of taste</li> <li>12. Stuffy nose</li> <li>13. Conjunctivitis</li> <li>14. Skin rash</li> <li>15. No symptom</li> </ol> |
| 52<br>53<br>54<br>55<br>56<br>57<br>58<br>59<br>60                                                                         | 3<br>Are asymptomatic patients capable of transmitting the disease? | <ol style="list-style-type: none"> <li>1. Yes</li> <li>2. No</li> </ol>                                                                                                                                                                                                                                                                                                                                  |

|    |                                                                                                                               |                                                                                                                                                                                                                                             |
|----|-------------------------------------------------------------------------------------------------------------------------------|---------------------------------------------------------------------------------------------------------------------------------------------------------------------------------------------------------------------------------------------|
| 4  | Which group of population has likelihood of developing severe disease? (please tick what is/are applicable)                   | <ol style="list-style-type: none"> <li>1. Elderly</li> <li>2. Pregnant women</li> <li>3. Children</li> <li>4. Smoker</li> <li>5. People with co-morbid (DM, HTN, asthma) conditions</li> <li>6. Obesity</li> <li>7. I don't know</li> </ol> |
| 5  | <b>Prevention methods:</b> Are you aware of that hand washing is one of the primary methods of preventing COVID-19 infection? | <ol style="list-style-type: none"> <li>1. Yes</li> <li>2. No</li> </ol>                                                                                                                                                                     |
| 6  | What is/are the preferable methods of preventing COVID-19 transmission?                                                       | <ol style="list-style-type: none"> <li>1. Hand wash with soap &amp; water</li> <li>2. Hand wash with water only</li> <li>3. Use of hand sanitizers</li> </ol>                                                                               |
| 7  | Duration of handwashing (minimum duration):                                                                                   | <ol style="list-style-type: none"> <li>1. 10 seconds</li> <li>2. 20 seconds</li> <li>3. 30 seconds</li> <li>4. 40 seconds</li> <li>5. I don't know</li> </ol>                                                                               |
| 8  | Do you think use of face masks can prevent COVID-19 transmission?                                                             | <ol style="list-style-type: none"> <li>1. Yes</li> <li>2. No</li> </ol>                                                                                                                                                                     |
| 9  | Do you think double-mask use is effective in prevention?                                                                      | <ol style="list-style-type: none"> <li>1. Yes</li> <li>2. No</li> </ol>                                                                                                                                                                     |
| 10 | What is the recommended minimum distance to maintain adequate social distancing?                                              | <ol style="list-style-type: none"> <li>1. &lt;2 meter</li> <li>2. &gt;2 meter</li> <li>3. I don't know</li> </ol>                                                                                                                           |
| 11 | In order to prevent spread, do you think individuals should avoid going to crowded places and taking public transportation?   | <ol style="list-style-type: none"> <li>1. Yes</li> <li>2. No</li> </ol>                                                                                                                                                                     |
| 12 | Do you think you should stop to maintain social distancing if you are wearing a mask?                                         | <ol style="list-style-type: none"> <li>1. Yes</li> <li>2. No</li> </ol>                                                                                                                                                                     |
| 13 | Do you think you should avoid shaking hands and hugging while greeting people?                                                | <ol style="list-style-type: none"> <li>1. Yes</li> <li>2. No</li> </ol>                                                                                                                                                                     |

|    |                                                                                                   |                 |
|----|---------------------------------------------------------------------------------------------------|-----------------|
| 14 | Provided that your family member is COVID-19 positive, would you put yourself in self-quarantine? | 1. Yes<br>2. No |
| 15 | How long should people in contact with COVID-19 positive put into self-quarantine?                | ( )             |

| <b>D. Attitude</b> |                                                                                   |                 |
|--------------------|-----------------------------------------------------------------------------------|-----------------|
| 1                  | Do you agree that COVID-19 will be successfully controlled?                       | 1. Yes<br>2. No |
| 2                  | I have no concern of being infected with COVID-19                                 | 1. Yes<br>2. No |
| 3                  | Do you have confidence that Ethiopia will win the battle against COVID-19?        | 1. Yes<br>2. No |
| 4                  | Is the Ethiopian government handling the COVID-19 health crisis well?             | 1. Yes<br>2. No |
| 5                  | Do you think that wearing a face mask will effectively prevent COVID-19?          | 1. Yes<br>2. No |
| 6                  | Do you think that adequate social distancing will effectively prevent COVID-19?   | 1. Yes<br>2. No |
| 7                  | Do you think washing hands with soap and water helps to prevent COVID-19?         | 1. Yes<br>2. No |
| 8                  | Would you be willing to tell people if you were having COVID-19 symptoms?         | 1. Yes<br>2. No |
| 9                  | Would you inform the health authorities if a family member exhibits the symptoms? | 1. Yes<br>2. No |
| 10                 | Do you think traditional medicine can prevent or treat COVID-19?                  | 1. Yes<br>2. No |
| 11                 | Do you think COVID-19 doesn't affect youngsters?                                  | 1. Yes<br>2. No |

| <b>E. Practice</b> |                                                                 |                                                                                                                                                                       |
|--------------------|-----------------------------------------------------------------|-----------------------------------------------------------------------------------------------------------------------------------------------------------------------|
| 1                  | In recent days have you worn a mask leaving home?               | <ol style="list-style-type: none"> <li>1. Always</li> <li>2. Sometimes</li> <li>3. Never</li> </ol>                                                                   |
| 2                  | Do you wash your hands before putting your mask on?             | <ol style="list-style-type: none"> <li>1. Yes</li> <li>2. No</li> </ol>                                                                                               |
| 3                  | What kind of mask do you use?                                   | <ol style="list-style-type: none"> <li>1. surgical</li> <li>2. N-95</li> <li>3. cloth</li> </ol>                                                                      |
| 4                  | If cloth, how often do you wash and reuse it?                   | <ol style="list-style-type: none"> <li>1. Everyday</li> <li>2. Weekly</li> <li>3. monthly</li> </ol>                                                                  |
| 5                  | -If surgical mask, how often do you change?                     | <ol style="list-style-type: none"> <li>1. Everyday</li> <li>2. Weekly</li> <li>3. monthly</li> </ol>                                                                  |
| 6                  | If you reuse a mask, where/ how do you store it?                | <ol style="list-style-type: none"> <li>1. In the pocket</li> <li>2. plastic bag</li> <li>3. Holding on hands</li> </ol>                                               |
| 7                  | Do you touch your face while wearing a mask?                    | <ol style="list-style-type: none"> <li>1. Always</li> <li>2. Sometimes</li> <li>3. Never</li> </ol>                                                                   |
| 8                  | Do you avoid touching your mask?                                | <ol style="list-style-type: none"> <li>1. Yes</li> <li>2. No</li> </ol>                                                                                               |
| 9                  | How do you take off your mask?                                  | <ol style="list-style-type: none"> <li>1. from the front of mask</li> <li>2. from the string of mask</li> </ol>                                                       |
| 10                 | How do you greet your friends?                                  | <ol style="list-style-type: none"> <li>1. hand shake</li> <li>2. hugging</li> <li>3. elbow touching</li> <li>4. waving hand/without contact</li> </ol>                |
| 11                 | In recent days have you practiced maintain your distance at 2m? | <ol style="list-style-type: none"> <li>1. Yes</li> <li>2. No</li> </ol>                                                                                               |
| 12                 | When do you wash your hands?                                    | <ol style="list-style-type: none"> <li>1. After I touch dirty materials such as Birr, door handles</li> <li>2. After I touch my nose or ears or skin parts</li> </ol> |

|  |  |                                                                                                                                                                                                                   |
|--|--|-------------------------------------------------------------------------------------------------------------------------------------------------------------------------------------------------------------------|
|  |  | <ol style="list-style-type: none"> <li>3. Before putting on a mask and after taking off a mask</li> <li>4. After coughing and sneezing into hands</li> <li>5. When entering and leaving a public place</li> </ol> |
|--|--|-------------------------------------------------------------------------------------------------------------------------------------------------------------------------------------------------------------------|

## F. Vaccine

|   |                                                        |                                                                                                                                                                                                                                                                                                                                                                                                                                                                                                                                                                                                                                                                                                    |
|---|--------------------------------------------------------|----------------------------------------------------------------------------------------------------------------------------------------------------------------------------------------------------------------------------------------------------------------------------------------------------------------------------------------------------------------------------------------------------------------------------------------------------------------------------------------------------------------------------------------------------------------------------------------------------------------------------------------------------------------------------------------------------|
| 1 | Have you heard about any prospective COVID-19 vaccine? | <ol style="list-style-type: none"> <li>1. Yes</li> <li>2. No</li> </ol>                                                                                                                                                                                                                                                                                                                                                                                                                                                                                                                                                                                                                            |
| 2 | If yes, where did you get the information from?        | <ol style="list-style-type: none"> <li>1. Internet/social media</li> <li>2. Mass media (Television, radio)</li> <li>3. Newspapers</li> <li>4. Other sources</li> </ol> <p>If other sources, specify (                      )</p>                                                                                                                                                                                                                                                                                                                                                                                                                                                                   |
| 3 | Will you get vaccinated, if possible?                  | <ol style="list-style-type: none"> <li>1. Yes</li> <li>2. No</li> <li>3. Not sure</li> </ol>                                                                                                                                                                                                                                                                                                                                                                                                                                                                                                                                                                                                       |
| 4 | If no, why?                                            | <ol style="list-style-type: none"> <li>1. The vaccine itself might cause the infection</li> <li>2. I'm worried about the side effects</li> <li>3. I believe it will be used as a biological weapon to serve those who produce vaccine</li> <li>4. I don't find it reliable as it took a short time to get developed</li> <li>5. I don't think the vaccines produced will be effective</li> <li>6. I don't think I have enough information about the vaccines</li> <li>7. I believe COVID-19 is exaggerated, it is not a risky disease, so no vaccine is needed</li> <li>8. I prefer other ways of protection</li> <li>9. In general, I have doubts about the vaccine</li> <li>10. Other</li> </ol> |
| 5 | Should children be vaccinated too?                     | <ol style="list-style-type: none"> <li>1. Yes</li> <li>2. No</li> </ol>                                                                                                                                                                                                                                                                                                                                                                                                                                                                                                                                                                                                                            |

|   |                                   |  |
|---|-----------------------------------|--|
| 6 | If the answer is no, explain why? |  |
|---|-----------------------------------|--|

### Questions for the in-depth interview

1. How do you know about COVID-19? (Probe: transmission mechanisms, prevention strategies, vaccines availability, perceptions towards the vaccines)
2. What were your initial reactions towards COVID-19 when you first heard about it? How about now?
3. What are your thoughts on the COVID-19 vaccine? (Probe: availability, efficacy, perceptions on quality, side effects)
4. What factors do you think will hinder people from receiving COVID-19 vaccines?

## SRQR Reporting checklist for qualitative study

|                                            | Reporting item                                                                                                                                                                                                                                                                                                                                                                                                                                                                                                                                                                                                                       | Page number |
|--------------------------------------------|--------------------------------------------------------------------------------------------------------------------------------------------------------------------------------------------------------------------------------------------------------------------------------------------------------------------------------------------------------------------------------------------------------------------------------------------------------------------------------------------------------------------------------------------------------------------------------------------------------------------------------------|-------------|
| <b>Title</b>                               |                                                                                                                                                                                                                                                                                                                                                                                                                                                                                                                                                                                                                                      |             |
|                                            | Concise description of the nature and topic of the study identifying the study as qualitative or indicating the approach (e.g. ethnography, grounded theory) or data collection methods (e.g. interview, focus group) is recommended                                                                                                                                                                                                                                                                                                                                                                                                 | Title       |
| <b>Abstract</b>                            |                                                                                                                                                                                                                                                                                                                                                                                                                                                                                                                                                                                                                                      |             |
|                                            | Summary of the key elements of the study using the abstract format of the intended publication; typically includes background, purpose, methods, results and conclusions                                                                                                                                                                                                                                                                                                                                                                                                                                                             | Abstract    |
| <b>Introduction</b>                        |                                                                                                                                                                                                                                                                                                                                                                                                                                                                                                                                                                                                                                      |             |
| Problem formulation                        | Description and significance of the problem / phenomenon studied: review of relevant theory and empirical work; problem statement                                                                                                                                                                                                                                                                                                                                                                                                                                                                                                    | Page # 4    |
| Purpose or research question               | Purpose of the study and specific objectives or questions                                                                                                                                                                                                                                                                                                                                                                                                                                                                                                                                                                            | Page # 5    |
| <b>Methods</b>                             |                                                                                                                                                                                                                                                                                                                                                                                                                                                                                                                                                                                                                                      |             |
| Qualitative approach and research paradigm | Qualitative approach (e.g. ethnography, grounded theory, case study, phenomenology, narrative research) and guiding theory if appropriate; identifying the research paradigm (e.g. postpositivist, constructivist / interpretivist) is also recommended; rationale. The rationale should briefly discuss the justification for choosing that theory, approach, method or technique rather than other options available; the assumptions and limitations implicit in those choices and how those choices influence study conclusions and transferability. As appropriate the rationale for several items might be discussed together. | Page # 5    |
| Researcher characteristics and reflexivity | Researchers' characteristics that may influence the research, including personal attributes, qualifications / experience, relationship with participants, assumptions and / or presuppositions; potential or actual interaction between                                                                                                                                                                                                                                                                                                                                                                                              | Page # 5    |



|                                              |                                                                                                                                                                                                                                                                                         |               |
|----------------------------------------------|-----------------------------------------------------------------------------------------------------------------------------------------------------------------------------------------------------------------------------------------------------------------------------------------|---------------|
|                                              | researchers' characteristics and the research questions, approach, methods, results and / or transferability                                                                                                                                                                            |               |
| Context                                      | Setting / site and salient contextual factors; rationale                                                                                                                                                                                                                                | Page # 5      |
| Sampling strategy                            | How and why research participants, documents, or events were selected; criteria for deciding when no further sampling was necessary (e.g. sampling saturation); rationale                                                                                                               | Page # 6      |
| Ethical issues pertaining to human subjects  | Documentation of approval by an appropriate ethics review board and participant consent, or explanation for lack thereof; other confidentiality and data security issues                                                                                                                | Page # 7      |
| Data collection methods                      | Types of data collected; details of data collection procedures including (as appropriate) start and stop dates of data collection and analysis, iterative process, triangulation of sources / methods, and modification of procedures in response to evolving study findings; rationale | Page # 6      |
| Data collection instruments and technologies | Description of instruments (e.g. interview guides, questionnaires) and devices (e.g. audio recorders) used for data collection; if / how the instruments(s) changed over the course of the study                                                                                        | Page # 6      |
| Units of study                               | Number and relevant characteristics of participants, documents, or events included in the study; level of participation (could be reported in results)                                                                                                                                  | Page # 5      |
| Data processing                              | Methods for processing data prior to and during analysis, including transcription, data entry, data management and security, verification of data integrity, data coding, and anonymisation / deidentification of excerpts                                                              | Page # 7      |
| Data analysis                                | Process by which inferences, themes, etc. were identified and developed, including the researchers involved in data analysis; usually references a specific paradigm or approach; rationale                                                                                             | Page # 7      |
| Techniques to enhance trustworthiness        | Techniques to enhance trustworthiness and credibility of data analysis (e.g. member checking, audit trail, triangulation); rationale                                                                                                                                                    | Page # 7      |
| <b>Results/findings</b>                      |                                                                                                                                                                                                                                                                                         |               |
| Syntheses and interpretation                 | Main findings (e.g. interpretations, inferences, and themes); might include development of a theory or model, or integration with prior research or theory                                                                                                                              | Page # 8 - 10 |
| Links to empirical data                      | Evidence (e.g. quotes, field notes, text excerpts, photographs)                                                                                                                                                                                                                         | Page # 8 - 10 |

|                                                                                             |                                                                                                                                                                                                                                                                                                          |                |
|---------------------------------------------------------------------------------------------|----------------------------------------------------------------------------------------------------------------------------------------------------------------------------------------------------------------------------------------------------------------------------------------------------------|----------------|
|                                                                                             | to substantiate analytic findings                                                                                                                                                                                                                                                                        |                |
| <b>Discussion</b>                                                                           |                                                                                                                                                                                                                                                                                                          |                |
| Integration with prior work, implications, transferability and contribution(s) to the field | Short summary of main findings; explanation of how findings and conclusions connect to, support, elaborate on, or challenge conclusions of earlier scholarship; discussion of scope of application / generalizability; identification of unique contributions(s) to scholarship in a discipline or field | Page # 11 - 13 |
| Limitations                                                                                 | Trustworthiness and limitations of findings                                                                                                                                                                                                                                                              | Page # 13      |
| <b>Other</b>                                                                                |                                                                                                                                                                                                                                                                                                          |                |
| Conflicts of interest                                                                       | Potential sources of influence of perceived influence on study conduct and conclusions; how these were managed                                                                                                                                                                                           | Page # 3       |
| Funding                                                                                     | Sources of funding and other support; role of funders in data collection, interpretation and reporting                                                                                                                                                                                                   | Page # 3       |
